# Supplementary material
Source: ML conference proceedings conference paper supplement (https://openreview.net/forum?id=sXD4idbnBw)
Supplement: supplementary_material [file attachment]

---

# Why Differentially-Private Local SGD

## – An Analysis of Biased Synchronized-Only Iterates

---

Anonymous Author(s)

Affiliation

Address

email

### Abstract

1 We argue to use Differentially-Private Local Stochastic Gradient Descent (DP-  
2 LSGD) in both centralized and distributed setups, and explain why DP-LSGD  
3 enjoys higher clipping efficiency and produces less clipping bias compared to clas-  
4 sic Differentially-Private Stochastic Gradient Descent (DP-SGD). For both convex  
5 and non-convex optimization, we present generic analysis on noisy synchronized-  
6 only iterates in LSGD, the building block of federated learning, and study its  
7 applications to differentially-private gradient methods with clipping-based sen-  
8 sitivity control. We point out that given the current *decompose-then-compose*  
9 framework, there is no essential gap between the privacy analysis of centralized  
10 and distributed learning, and DP-SGD is a special case of DP-LSGD. We thus build  
11 a unified framework to characterize the clipping bias via the second moment of  
12 local updates, which initiates a direction to systematically instruct DP optimization  
13 by variance reduction. We show DP-LSGD with multiple local iterations can  
14 produce more concentrated local updates and then enables a more efficient exploita-  
15 tion of the clipping budget with a better utility-privacy tradeoff. In addition, we  
16 prove that DP-LSGD can converge faster to a small neighborhood of global/local  
17 optimum compared to regular DP-SGD. Thorough experiments on practical deep  
18 learning tasks are provided to support our developed theory.

## 19 1 Introduction

20 Local Stochastic Gradient Descent (LSGD) [1, 2] and (Local/Client-Level) Differential Privacy (DP)  
21 [3, 4, 5] are two popular methods to address the issues of communication efficiency and data privacy,  
22 respectively. Rooted in the *FedAvg* framework first proposed in [6], instead of communicating and  
23 synchronizing on the local updates from each user at each iteration, LSGD [1] randomly samples  
24 participants to perform gradient descent on their local data in parallel and only aggregates their local  
25 updates periodically. Though LSGD is a simple generalization of SGD to a distributed setup with a  
26 lower synchronization frequency, empirically it is known to produce promising performance, with  
27 regard to both communication efficiency and convergence rate [7]. When each user holds i.i.d. data,  
28 LSGD provably achieves a linear speedup in the number of users with also asymptotic improvements  
29 on the communication overhead over regular distributed SGD to produce equivalent accuracy [1, 2].

30 As for privacy preservation, DP [3, 8] provides a semantically precise way to quantify the data leakage  
31 from any processing. At a high level, DP is an input-independent guarantee which ensures that an ad-  
32 versary cannot infer the participation of an individual datapoint easily from the release. For example,  
33 the classic  $(\epsilon, \delta)$ -DP with small security parameters  $\epsilon$  and  $\delta$  implies a large Type I or Type II error for  
34 an adversarial hypothesis testing to guess whether an arbitrary individual is involved in the processing  
35 [9]. In DP research, one key problem is to determine the *sensitivity*, the worst-case influence/change  
36 on the output of the objective processing after arbitrarily replacing an individual in an input set. Only

with tractable sensitivity, one can then apply proper randomization/perturbation such as the Gaussian or Laplace mechanism [10] to produce required security parameters. Unfortunately, sensitivity is in general NP-hard to compute [11]. To this end, in practice, a commonly-applied alternative is the *decompose-then-compose* framework: a complicated processing is first (approximately) decomposed into several simpler (possibly adaptive) subroutines such as mean estimation, each of whose sensitivity is controllable. A *white-box* adversary is then assumed who can observe the intermediate computations, and an upper bound on the privacy loss is derived by the composition of the leakage from the virtual release in each step [12].

In the applications of machine learning, where the processing function returns a model trained on possibly sensitive data, arguably the most popular and generic DP privatization method is DP-SGD [13, 14]. As a representative of the above-mentioned decompose-then-compose framework, DP-SGD views the SGD as a sequence of adaptive gradient mean estimations. To ensure a bounded sensitivity guarantee, each per-sample gradient is clipped, usually, in  $l_2$ -norm [14] to some constant  $c$ , which is essentially a projection to an  $l_2$ -norm ball of radius  $c$ . Noise, which is determined by both the number of iterations  $T$  and the clipping threshold  $c$  (sensitivity bound), is then added to the clipped stochastic gradient in each iteration to produce satisfied DP parameters  $(\epsilon, \delta)$  under  $T$ -fold composition. A wider dimension and a longer convergence time  $T$  will consequently require a larger DP noise. Though the implementation of DP-SGD does not require any additional assumptions on either model or training data, it is notorious for heavy utility loss, especially for deep learning. Moreover, the understanding of the clipping bias from this artificial sensitivity control remains limited. In general, due to the bias, clipped SGD will not converge even without noise perturbation [15, 16].

Given the artificial assumption that DP-SGD releases the intermediate computations, there is no essential gap between the privacy analysis of the centralized and local SGD, except that in the distributed setup one may apply different DP metrics such as Local DP (LDP) [4] or client-level DP [5] to consider the privacy preservation for each user’s local data. More interestingly, it is worth noting the connection among different problems in federated learning and DP-SGD that are essentially equivalent. First, it is not hard to see that DP-SGD is a special case of DP-LSGD. DP-SGD can be viewed as:  $n$  nodes, each holds a sample, and a virtual server collects the clipped stochastic gradient from a subset of sampled nodes *in every iteration*, and publishes a noisy gradient descent. DP-LSGD can be similarly defined where the only difference is that the server may not synchronize on each iteration, but clips and aggregates a linear combinations of local gradients, *periodically*. Thus, as a primary concern in federated learning, a smaller communication overhead in a lower synchronization/aggregation frequency would also imply less leakage and a smaller composition bound of privacy loss. On the other hand, the study on the utility loss by perturbation and artificial sensitivity control (clipping) could also be used to analyze federated learning with compressed communication [17] where there exists quantification error in broadcasted local updates. Therefore, in this paper, we aim to provide a unified analysis for both noisy LSGD and DP-LSGD/SGD to get new insights. Before we can build useful theory to capture these concerns from different perspectives, several technical challenges need to be addressed.

**Utility of "Synchronized/Published" Iterate Only:** Many existing convergence results [2, 18, 19, 20, 21] on non-private LSGD are developed on the (weighted) average of all iterates. These include the intermediate iterates produced during the local updates from each user/node, which will not be exposed or shared. To properly characterize the effect of perturbation, a more appropriate and realistic convergence guarantee is to measure the performance of synchronized (shared) iterates only. This is also important to help understand the practical performance of LSGD as neither the server nor users have access to all intermediate computations. Such measurement is especially necessary when we apply LSGD in a private version: the utility of concern is only with respect to the released outputs, and anything assumed to be published would incur privacy loss and increase the scale of DP noise.

**Clipping Bias and Data Heterogeneity:** In practice, tight sensitivity of many data processing algorithms is intractable and thus a very popular but artificial control is clipping. However, clipping could also bring non-negligible bias. In general, there is no convergence guarantee for clipped SGD if we only assume the stochastic gradient is of bounded variance [15], though under more restrictive assumptions, for example, when the stochastic gradient is in a symmetric [15] or light-tailed [22] distribution, or provided generalized smoothness [23], some (near) convergence results are known. A concise characterization of such clipping bias still largely remains open, especially for deep learning. The bias is even more complicated in the more general DP-LSGD. To provide meaningful theory to instruct systematic bias reduction, we do not want to assume Lipschitz continuity or bounded

94 gradient, which may make the analysis trivial and impractical. Thus, the desired analysis essentially  
 95 captures the scenario given heavy data heterogeneity, and the results should not require a bounded  
 96 difference among the local updates.

97 In this paper, through tackling the above-mentioned challenges, we aim to provide useful and intuitive  
 98 theory to understand practical performance of LSGD and instruct optimization with DP guarantees.  
 99 In particular, we want to explain how DP-LSGD out-performs regular DP-SGD. We summarize our  
 100 contributions as follows.

- 101 1. With only a mild assumption that the stochastic gradient is of bounded variance, we present  
 102 the convergence analysis on the released-only iterates of LSGD under perturbation for both  
 103 convex and non-convex smooth optimization in Theorem 3.1 and 3.2. In particular, for the  
 104 general convex case, we show more powerful last iterate convergence, which could be of  
 105 independent interest in developing generic last-iterate analysis with unbounded gradients.
- 106 2. We then generalize our results to study the utility of DP-LSGD, where DP-SGD becomes  
 107 a special case. In particular, we use the incremental norm of local update (see Definition  
 108 4.1) to characterize the clipping bias and show DP-LSGD has a faster convergence rate to a  
 109 small neighborhood of global/local optimum as compared to DP-SGD.
- 110 3. We further show LSGD behaves as an efficient variance reduction of local update, where  
 111 multiple local GDs with a small learning rate cancel out substantial sampling noise, and  
 112 enable more efficient clipping compared to DP-SGD. Thorough experiments show that  
 113 DP-LSGD produces a much sharpened utility-privacy tradeoff in practical deep learning.

## 114 1.1 Related Works

115 **Convergence Analysis of LSGD:** With the increasing scale of both training data and models,  
 116 federated learning has become an important paradigm in modern machine learning, where LSGD and  
 117 its variants form the building block. Though the idea of LSGD can be traced back to earlier works  
 118 [24, 25], the theoretical convergence analysis has only been proved recently. A common strategy to  
 119 show convergence is to consider a virtual average of all the intermediate iterates produced by each  
 120 user, and keep track of the divergence (dissimilarity) between the virtual average and the local iterate.  
 121 In the setup where each user holds i.i.d. data, Stich in [1] studied strongly-convex optimization with  
 122 LSGD and showed a linear speedup in the number of users/nodes. [26] presented non-convex analysis  
 123 under the Lipschitz continuity assumption where the divergence of local update is also bounded.

124 For the more general applications with heterogeneous data, [27] studied the convex case with local  
 125 GD (without sampling on either users or users' local data) but still under Lipschitz continuity. [2]  
 126 presented more generic and tighter analysis for LSGD without assumptions on bounded gradient for  
 127 both strongly and general convex optimization. Further generalization of LSGD to the decentralized  
 128 setup under arbitrary network topology was considered in [19, 28, 29]. However, many existing  
 129 works [2, 19, 28] only showed the convergence rate relying on all the intermediate averages. To our  
 130 knowledge, the first generic analysis for synchronized-only iterates was shown in [30]. [30] proposed  
 131 Scaffold, a generalized LSGD with careful correction on the client-drift caused by data heterogeneity.  
 132 Compared to existing works, in this paper, we prove more powerful last-iterate analysis for general  
 133 convex optimization with clipping and perturbation for privacy. It is also worth mentioning that with  
 134 a different motivation, there is another line of works also studying noisy LSGD to capture the effect  
 135 of compressed local updates to further save the communication cost. But, in most existing related  
 136 works [17, 31], the compression error is assumed to be independent with zero-mean. As we need to  
 137 study DP-LSGD with clipped local update, which introduces bias in the local update generation, in  
 138 this paper we present more involved analysis to handle such adaptive and biased perturbation.

139 **Convergence Analysis of DP-SGD and DP-LSGD:** Asymptotically, under Lipschitz continuity, DP-  
 140 SGD is known to produce a tight utility-privacy tradeoff [32, 33], where no bias is produced given a  
 141 clipping threshold larger than the Lipschitz constant. However, without Lipschitz continuity, practical  
 142 understanding of DP-SGD remains limited. On one hand, negative examples are shown in [15, 16]  
 143 where clipped-SGD in general will not converge, and in practice clipped-SGD does produce bias  
 144 and has a lower convergence rate, especially in deep learning applications compared to regular SGD  
 145 [16]. On the other hand, under more restrictive assumptions on the stochastic gradient distribution,  
 146 clipped-SGD can be shown to (nearly) converge [15, 22, 23]. A generic characterization on the  
 147 clipping bias still largely remains open. As a consequence, there is little known meaningful theory to

systematically instruct optimization algorithms with DP guarantees, and most existing private deep learning works are empirical, which aim to search for the optimal model and hyperparameters for objective training data [34, 35, 36]. As for DP-LSGD, to our knowledge the only known theoretical result that captures the clipping bias is [16]. However, [16] still assumes globally bounded gradient compared to bounded second moment as assumed in our results, and its main motivation is to study the clipping effect in client-level DP. In this paper, we show more intuitive and generic analysis of DP-LSGD for both convex and non-convex optimization, and our motivations are also very different. We set out to provide usable quantification on the utility loss due to clipping and *we argue to apply DP-LSGD both in the centralized and distributed setup*, since DP-LSGD can significantly reduce the clipping bias with a faster convergence rate.

## 2 Preliminaries

We focus on the classic Empirical Risk Minimization (ERM) problem. Given a dataset  $\mathcal{D} = \{(x_i, y_i), i = 1, 2, \dots, n\}$ , the loss function is defined as  $F(w) = \frac{1}{n} \cdot \sum_{i=1}^n f(w, x_i, y_i) = \frac{1}{n} \cdot \sum_{i=1}^n f_i(w)$ . We will consider the cases where the loss function  $f_i(w) : \mathcal{W} \rightarrow \mathbb{R}^+$  is convex or non-convex.  $w^* = \arg \min_w F(w)$  represents the global optimum. Some formal definitions about the properties of the objective loss function are defined as follows.

**Definition 2.1** (Smoothness). *A function  $f$  is  $\beta$ -smooth on  $\mathcal{W}$  if the gradient  $\nabla f(w)$  is  $\beta$ -Lipschitz such that for all  $w, w' \in \mathcal{W}$ ,  $\|\nabla f(w) - \nabla f(w')\| \leq \beta \|w' - w\|$ .*

**Definition 2.2** (Convexity and Strong Convexity). *A function  $f(w)$  is  $\lambda$ -convex on  $\mathcal{W}$  if for all  $w, w' \in \mathcal{W}$ ,  $\frac{\lambda}{2} \|w - w'\|^2 \leq f(w) - f(w') - \langle \nabla f(w'), w - w' \rangle$ . We call  $f(w)$  general convex if  $\lambda = 0$ , and  $f(w)$  is strongly convex if  $\lambda > 0$ .*

**Assumption 2.1** (Bounded Variance of Stochastic Gradient). *For any  $w \in \mathcal{W}$  and an index  $i$  that is randomly selected from  $\{1, 2, \dots, n\}$ , there exists  $\tau > 0$  such that  $\mathbb{E}[\|\nabla F(w) - \nabla f_i(w)\|^2] \leq \tau$ .*

Assumption 2.1 is the only additional assumption we need for the analysis of non-private LSGD without clipping. We formally present the non-private LSGD algorithm in Algorithm 1 which uses non-clipped local update (3). The whole process is formed of  $T$  phases. In each phase, by  $q$ -Poisson sampling, in expectation ( $nq$ ) many users will be selected to perform  $K$  local gradient descents on their local data before broadcasting the local update. To match the DP-LSGD where the local function  $f_i(w)$  held by each user may only be determined by a single datapoint, we do not consider an additional stochastic gradient oracle on the local function in Algorithm 1, but only assume random sampling on the user level at each phase. However, our results can be easily generalized to the scenario with stochastic local gradient. Moreover, we assume Poisson sampling in Algorithm 1 so as to match the setup of DP-LSGD, since given current studies on privacy amplification by sampling, Poisson sampling can produce the tightest results [37] (and has become the most popular option in practice [36, 38]). In the following, we introduce the definition of DP.

**Definition 2.3** (Differential Privacy [38]). *Given a universe  $\mathcal{X}^*$ , we say that two datasets  $X, X' \subseteq \mathcal{X}^*$  are adjacent, denoted as  $X \sim X'$ , if  $X = X' \cup x$  or  $X' = X \cup x$  for some additional datapoint  $x \in \mathcal{X}$ . A randomized algorithm  $\mathcal{M}$  is said to be  $(\epsilon, \delta)$ -differentially-private (DP) if for any pair of adjacent datasets  $X, X'$  and any event set  $O$  in the output domain of  $\mathcal{M}$ , it holds that*

$$\mathbb{P}(\mathcal{M}(X) \in O) \leq e^\epsilon \cdot \mathbb{P}(\mathcal{M}(X') \in O) + \delta.$$

In Definition 2.3, we apply the unbounded DP definition as adopted in most existing DP-SGD works [16, 35, 38], where the two adjacent datasets are defined to differ in one datapoint. One may also apply the bounded DP definition [8] by defining the adjacent datasets as arbitrarily replacing a datapoint. However, as a stronger definition, bounded DP will also face a larger sensitivity bound.

We can now formally describe DP-LSGD and DP-SGD. In (2) of Algorithm 1, a clipping operation on a vector  $v$  with threshold  $c$  is defined as  $\mathcal{CP}(v, c) = v \cdot \min\{1, c/\|v\|\}$ , which ensures a bounded sensitivity up to  $c$ . Using the clipped local update (2), by selecting  $Q^{(t)}$  to be proper DP noise, Algorithm 1 captures DP-SGD when  $K = 1$  and DP-LSGD for general  $K \geq 1$ . DP-LSGD (SGD) is essentially an LSGD (SGD) with clipped local update (per-sample gradient) and additional DP noise. Running for  $T$  iterations with a total privacy budget  $(\epsilon, \delta)$ , one may select  $Q^{(t)} \sim \mathcal{N}(0, \sigma^2 \cdot \mathbf{I}_d)$  where  $\sigma = \tilde{O}(qc\sqrt{T \log(1/\delta)})/\epsilon$  by the composition bound [38]. The privacy analysis and the noise bound are identical for both DP-LSGD and DP-SGD given the same clipping threshold  $c$ .

---

**Algorithm 1** (Differentially Private) Local SGD with Noisy (Clipped) Periodic Averaging

---

1: **Input:** A system of  $n$  workers where each holds a local loss function  $F(w) = f_i(w)$ , sampling rate  $q$ , update step size  $\eta$ , local update length  $K$  and global synchronization number  $T$ , clipping threshold  $c$ , and initialization  $\bar{w}^{(0)}$  with synchronization noise  $Q^{(1:T)}$ .  
2: **for**  $t = 1, 2, \dots, T$  **do**  
3:   Implement i.i.d. sampling to select an index batch  $S^{(t)} = \{[1], \dots, [B_t]\}$  from  $\{1, 2, \dots, n\}$  of size  $B_t$ .  
4:   **for**  $i = 1, 2, \dots, B_t$  in parallel **do**  
5:      $w_{[i]}^{(t,0)} = \bar{w}^{(t-1)}$ .  
6:     **for**  $k = 1, 2, \dots, K$  **do**  
7:        $w_{[i]}^{(t,k)} = w_{[i]}^{(t,k-1)} - \eta \nabla f_{[i]}(w_{[i]}^{(t,k-1)})$ .  
8:     **end for**  
9:     Clip the local update as  $\Delta w_{[i]}^{(t)} = \mathcal{CP}(w_{[i]}^{(t,K)} - \bar{w}^{(t-1)}, c)$   
10:   **end for**  
11:   **if** to ensure Differential Privacy with clipping **then**  
12:     
$$\bar{w}^{(t)} = \bar{w}^{(t-1)} + \frac{1}{nq} \cdot \left( \sum_{i=1}^{B_t} \Delta w_{[i]}^{(t)} \right) + Q^{(t)}$$
  
13:   **else**  
14:     
$$\bar{w}^{(t)} = \frac{1}{nq} \cdot \left( \sum_{i=1}^{B_t} w_{[i]}^{(t,K)} \right) + Q^{(t)}$$
  
15:   **end if**  
16: **end for**  
17: **Output:**  $\bar{w}^{(t)}$  for  $t = 1, 2, \dots, T$ .

---

199 We want to stress again that our motivation to study DP-LSGD is not because we only focus on the  
200 federated setup, but to provide a unified analysis of the clipping bias and argue for using DP-LSGD  
201 *even in the centralized setup*. Our results are straightforwardly applicable to distributed learning with  
202 local DP [4] or client-level DP [5], where the only difference is that we may add a larger noise  $Q^{(t)}$   
203 determined by the number of local datapoints or the users involved, respectively, for these stronger  
204 DP definitions. As for the possible communication restriction where we need to add discrete noise of  
205 finite precision, one may replace the Gaussian noise by the Binomial mechanism [39].

### 206 3 Convergence of Synchronized-Only Iterate in Noisy Non-Clipped LSGD

207 In this section, we will study the convergence analysis of LSGD in Algorithm 1 using the non-clipped  
208 local update (3) for both convex and non-convex optimization.

209 **Theorem 3.1** (Last-iterate Convergence of Noisy LSGD in General Convex Optimization). *For an*  
210 *objective function  $F(w) = \frac{1}{n} \cdot \sum_{i=1}^n f_i(w)$  where  $f_i(w)$  is convex and  $\beta$ -smooth with variance-*  
211 *bounded gradient (Assumption 2.1), when  $\eta < \min\{\frac{\beta}{\sqrt{24K}}, \frac{1}{20\beta}, \frac{1}{2\beta+3K\beta/(nq)}\}$ ,  $\log(TK) \geq 2$ , and*  
212  *$Q^{(t)}$  is an independent noise such that  $\mathbb{E}[Q^{(t)}] = 0$  and  $\mathbb{E}[\|Q^{(t)}\|^2] \leq \bar{Q}$ , for some parameter  $\bar{Q}$  for*  
213  *$t = 1, 2, \dots, T$ , when  $K^2 = O(nq)$ , Algorithm 1 with (3) ensures*

$$\begin{aligned} \mathbb{E}[F(\bar{w}^{(T)})] &\leq O(1) \cdot \left( \frac{\|\bar{w}^{(0)} - w^*\|^2}{\eta(TK + 1)} + \log(TK + 1) \left( \frac{\eta\tau}{nq} + K^2\tau\eta^2 + \bar{Q}/\eta + \tau\eta \right) \right. \\ &\quad \left. + \eta(\log(TK) + 1) (\|\bar{w}^{(0)} - w^*\|^2 + T(\beta\eta^3 K^3 \tau + \frac{K^4 \beta^2 \eta^4 \tau + K^2 \eta^2 \tau}{nq} + \bar{Q})) \right) \\ &= \tilde{O} \left( \frac{\|\bar{w}^{(0)} - w^*\|^2}{\sqrt{TK}} + \frac{\tau}{\sqrt{TK}} + \frac{K\tau}{T} + \sqrt{TK\bar{Q}} \right), \text{ if } \eta = O(1/\sqrt{TK}). \end{aligned}$$

214

The proof can be found in Appendix A. To prove Theorem 3.1, with a careful analysis on  $\|\bar{w}^{(t)} - w^*\|^2$ , we develop a new last-iterate analysis framework, different from existing works [40, 41, 42] which must count on the assumption of bounded gradient. In Theorem 3.1, we need to assume the noise  $Q$  to be independent and of zero-mean. Because we do not assume Lipschitz continuity of  $F(w)$ , we cannot provide a meaningful upper bound of the deviation between  $F(w)$  and  $F(w + Q)$  for arbitrary  $w$  and  $Q$  in general. However, provided the Lipschitz assumption, Theorem 3.1 can be easily generalized to handle biased perturbation. In Section 4, with an additional assumption on the similarity of the local functions (Assumption 4.2), we will show how to handle the clipping bias as a special biased noise. When there is no noise  $\bar{Q} = 0$ , provided that  $K = O(T^{1/3})$ , we show LSGD achieves  $\tilde{O}(\frac{\|\bar{w}^{(0)} - w^*\|^2 + \tau}{T^{2/3}})$  last-iterate convergence in general-convex optimization.

We now study the non-convex scenario.

**Theorem 3.2** (Synchronized-only Iterate Convergence of Noisy LSGD in Non-convex Optimization). *For an arbitrary objective function  $F(w) = \frac{1}{n} \cdot \sum_{i=1}^n f_i(w)$ , where  $f_i(w)$  is  $\beta$ -smooth and satisfies Assumption 2.1, and for arbitrary perturbation (not necessarily independent or of zero mean) where  $\mathbb{E}[\|Q^{(t)}\|^2] \leq \bar{Q}$ , when  $\eta < \min\{\frac{\beta}{\sqrt{24K}}, \frac{1}{4\beta K}, \frac{1}{20\beta}\}$ , Algorithm 1 with (3) ensures that*

$$\begin{aligned} \mathbb{E}\left[\frac{\sum_{t=1}^T \|\nabla F(\bar{w}^{(t-1)})\|^2}{T}\right] &\leq \frac{4F(\bar{w}^{(0)})}{TK\eta} + \frac{16\eta^2\tau\beta^2K^2}{nq} + \frac{4(1+\beta\eta)\sum_{t=1}^T \mathbb{E}[\|Q_i^{(t)}\|^2]}{\eta^2KT} \\ &= O\left(\frac{\tau^{1/3}}{T^{2/3}(nq)^{1/3}} + \frac{T^{2/3}\tau^{2/3}K\bar{Q}}{(nq)^{2/3}}\right), \end{aligned} \quad (4)$$

when we select  $\eta = O(\frac{(nq)^{1/3}}{T^{1/3}K\tau^{1/3}})$ . In particular, when  $Q^{(t)}$  is independent and  $\mathbb{E}[Q^{(t)}] = 0$ , and  $\eta = \Theta(1/K)$ , then

$$\mathbb{E}\left[\frac{\sum_{t=1}^T \|\nabla F(\bar{w}^{(t-1)})\|^2}{T}\right] \leq O\left(\frac{F(\bar{w}^{(0)})}{\eta TK} + \tau + \frac{\sum_{t=1}^T \beta \mathbb{E}[\|Q^{(t)}\|^2]}{\eta TK}\right) = O\left(\frac{1}{T} + \tau + \bar{Q}\right).$$

The proof can be found in Appendix B. In Theorem 3.2, we provide an analysis on the effect of generic perturbation, which can also be used to capture the clipping bias in DP-LSGD. When there is no perturbation, Theorem 3.2 has two implications. First, we show to ensure  $\min \mathbb{E}[\|\nabla F(\bar{w}^{(t)})\|^2] \leq \kappa$ , we need  $T = O(\frac{\sqrt{\tau/(nq)}}{\kappa^{3/2}})$ , which is tighter than the state-of-the-art results  $O(\frac{\tau/(nq)}{\kappa^2} + \frac{\sqrt{\tau}}{\kappa^{3/2}})$  in [30]. Second, compared to  $O(1/T^{2/3})$ , we also show that LSGD can converge faster in  $O(1/T)$  to a  $\tau$ -neighborhood of a saddle point. This is helpful to understand the practical performance of DP-LSGD with bias, as discussed in Section 4.2.

As a final remark, we want to mention it is possible to improve the convergence rate from  $O(1/T^{2/3})$  to  $O(1/T)$  via careful variance reduction or error feedback mechanism, such as Scaffold [30] or FedLin [43]. However, the proper implementation of those advanced tricks in DP-LSGD with additional sensitivity control is not clear. As a first step to systematically study the generic clipping bias, in this paper we only focus on the regular LSGD. We will explain and discuss possible generalizations in Section 6.

## 4 Utility and Clipping Bias of DP-LSGD and DP-SGD

In this section, we move to study DP-LSGD with clipped local update (2) in Algorithm 1. To have a clear comparison with DP-SGD, we still consider the centralized setup and  $F(w) = 1/n \cdot f_i(w)$  where each local function  $f_i(w)$  is determined by a single sample. To capture the clipping bias, we need to introduce a new term, termed *incremental norm*.

**Definition 4.1** (Incremental Norm). *Consider applying the private and clipping version of Algorithm 1 with (2) on  $F(w) = \sum_{i=1}^n f_i(w)$ . In the  $t$ -th phase, we define  $\Psi_i^{(t)} = \mathbf{1}(\|\Delta w_i^{(t)}\| > c) \cdot (\|\Delta w_i^{(t)}\| - c)$  as the incremental norm of the local update from  $f_i(w)$  compared to the clipping threshold  $c$ , for  $t = 1, 2, \dots, T$ .*

In Definition 4.1, the incremental norm  $\Psi_i^{(t)}$  simply quantifies the difference between the norm of the local update and its clipped version from  $f_i(w)$ . In the following, we will always assume the DP noise injected  $\mathbb{E}[\|Q^{(t)}\|^2] = \sigma^2 d$ , following the classic privacy analysis of DP-SGD [38].

It is not hard to observe that the clipped local update is essentially a scaled version of the original update, and thus virtually one may view DP-LSGD as a generalization of noisy LSGD but each local update applies a different and adaptively-selected learning rate. To show meaningful characterization on the difference among those learning rates, we need the following assumption as a generalization of bounded-variance stochastic gradient.

**Assumption 4.1** (Incremental norm of Bounded Second Moment). *When applying the clipped version of Algorithm 1 via (2) on an objective function  $F(w) = \frac{1}{n} \cdot \sum_{i=1}^n f_i(w)$ ,  $\mathbb{E}[(\sum_{i=1}^n (\Psi_i^{(t)})^2)/n]$  is upper bounded by  $\mathcal{B}^2$ , for some global parameter  $\mathcal{B}$  for  $t = 1, 2, \dots, T$ .*

Assumption 4.1 basically states that in expectation the square of  $l_2$ -norm of each local update is bounded. Assumption 4.1 also suggests that  $\mathbb{E}[(\sum_{i=1}^n \Psi_i^{(t)})/n] \leq \mathcal{B}$ .

#### 4.1 Utility of DP-LSGD in Convex Optimization

Another assumption we need for the analysis of DP-LSGD on general convex optimization is the similarity among the local functions.

**Assumption 4.2** ( $\gamma$  Similarity). *For  $F(w) = \frac{1}{n} \cdot \sum_{i=1}^n f_i(w)$ , local functions  $f_i$  are of  $\gamma$ -similarity to  $F$  such that for any  $w \in \mathcal{W}$ ,  $|f_i(w) - F(w)| \leq \gamma$ , for some constant  $\gamma > 0$ .*

The main reason why we need this additional Assumption 4.2 is because we do not assume Lipschitz continuity of  $F(w)$ . Thus, we alternatively consider to use the similarity among local functions to characterize the deviation of the evaluation of  $F(\cdot)$  on biased iterates.

**Theorem 4.1** (Last-iterate of DP-LSGD in General Convex Optimization). *For an arbitrary objective function  $F(w) = \frac{1}{n} \cdot \sum_{i=1}^n f_i(w)$  where  $f_i(w)$  is convex and  $\beta$ -smooth, and under Assumptions 2.1, 4.1 and 4.2, when  $\eta = O(1/\sqrt{TK})$  and  $Q^{(t)}$  is independent DP noise such that  $\mathbb{E}[Q^{(t)}] = 0$  and  $\mathbb{E}[\|Q^{(t)}\|^2] = \sigma^2 d$ ,  $t = 1, 2, \dots, T$ , then when  $K^2 = O(nq)$ , DP-LSGD with clipping threshold  $c$  ensures that*

$$\begin{aligned} \frac{c}{c + \mathcal{B}} \cdot \mathbb{E}[F(\bar{w}^{(T)}) - F(w^*)] &= \tilde{O}\left(\left(\frac{1}{\sqrt{TK}} + \frac{K}{nT}\right)\|\bar{w}^{(0)} - w^*\|^2 \right. \\ &\quad \left. + \left(\frac{K}{nT} + \frac{1}{\sqrt{TK}}\right)\left(1 + \frac{K^{3/2}}{\sqrt{T}} + \frac{K}{nq}\right)\tau + \left(\frac{K^{3/2}}{\sqrt{T}n} + 1\right)\frac{\gamma\mathcal{B}}{c + \mathcal{B}} + \sqrt{TK}\sigma^2 d\right). \end{aligned} \quad (5)$$

For  $(\epsilon, \delta)$ -DP, where  $\sigma = \tilde{O}(\frac{c\sqrt{T \log(1/\delta)}}{n\epsilon})$ , we have that

$$\begin{aligned} \mathbb{E}[F(\bar{w}^{(T)}) - F(w^*)] &= \tilde{O}\left(\underbrace{\frac{c + \mathcal{B}}{c} \cdot \left(\frac{\|\bar{w}^{(0)} - w^*\|^2}{\sqrt{TK}} + \left(\frac{1}{\sqrt{TK}} + \frac{K}{T}\right)\tau\right)}_{(A)} + \underbrace{\frac{\gamma\mathcal{B}}{c}}_{(B)} + \underbrace{\frac{c + \mathcal{B}}{c} \cdot \frac{T^{3/2}K^{1/2} \log(1/\delta)dc^2}{n^2\epsilon^2}}_{(C)}\right). \end{aligned}$$

The proof can be found in Appendix C. We focus on a practical scenario where  $\mathcal{B} = O(c)$ , i.e., the incremental norm of local updates is in the same order of the clipping threshold  $c$  selected, and thus  $(c + \mathcal{B})/c = O(1)$ . From Theorem 4.1, we show the last-iterate utility of DP-LSGD is captured by three terms: (A) a similar convergence rate as regular LSGD, (B) a clipping bias, and (C) the DP noise variance. First, ignoring the bias and noise, DP-LSGD still enjoys a convergence rate  $\tilde{O}(\frac{\|\bar{w}^{(0)} - w^*\|^2}{\sqrt{TK}} + (\frac{1}{\sqrt{TK}} + \frac{K}{T})\tau)$ . Second, the clipping bias is captured by  $(\gamma\mathcal{B})/c$ . This matches our intuition that a larger incremental norm  $\mathcal{B}$  combined with a smaller clipping threshold  $c$  will imply a more significant change on the local update and thus a larger bias. The last accumulated perturbation term is determined by the noise injected across each phase with an effect of  $\tilde{O}(\frac{T^{3/2}K^{1/2} \log(1/\delta)dc^2}{n^2\epsilon^2})$  for  $(\epsilon, \delta)$ -DP under  $T$ -fold composition.

As we consider the very generic setup with non-trivial clipping, Theorem 3.2 cannot be directly compared to the classic DP-utility tradeoff [32] given Lipschitz continuity, where a utility loss  $\tilde{\Theta}(\sqrt{d}/n\epsilon)$  is tight for convex optimization under  $(\epsilon, \delta)$ -DP. However, we have the following interesting observations. First, when we take the clipping threshold  $c = O(\eta) = O(1/\sqrt{TK})$  and  $K = O(T \cdot d/(n^2\epsilon^2))$ ,

DP-LSGD achieves the same optimal rate  $\tilde{O}(\sqrt{d}/n\epsilon)$  [33] ignoring the clipping bias. Second and more important, when the stochastic gradient variance  $\tau$  is in the same order of the clipping bias  $O(\gamma\mathcal{B}/c)$ , then by selecting  $c = \Theta(\eta)$  and  $K = \Theta(T)$ , Theorem 4.1 suggests that DP-LSGD will converge in  $O(1/T)$  to an  $O(\gamma\mathcal{B}/c + \frac{d}{n^2\epsilon^2})$  neighborhood of the global optimum. As a comparison, when we select  $K = 1$  in Theorem 4.1, it becomes the analysis of DP-SGD but the convergence rate to the neighborhood of global optimum in the same scale  $O(\gamma\mathcal{B}/c + \frac{d}{n^2\epsilon^2})$  is only  $O(1/\sqrt{T})$ . Moreover, as we will show in the next section, the local update bound  $\mathcal{B}$  in DP-SGD with  $K = 1$  in practice would be much larger than that of DP-LSGD with a relatively larger  $K$ . As a simple generalization, we also include an analysis of DP-LSGD on strongly-convex functions in Appendix D, and we move our focus to the non-convex optimization in the following.

## 4.2 Utility of DP-LSGD in Non-convex Optimization

**Theorem 4.2** (DP-LSGD in Non-convex Optimization). *For  $F(w) = \frac{1}{n} \cdot \sum_{i=1}^n f_i(w)$  where  $f_i(w)$  is  $\beta$ -smooth and satisfies Assumptions 2.1 and 4.1, when  $\eta = O(1/K)$ , DP-LSGD ensures that*

$$\mathbb{E}\left[\frac{\sum_{t=1}^T \|\nabla F(\bar{w}^{(t-1)})\|^2}{T}\right] \leq \frac{4F(\bar{w}^{(0)})}{TK\eta} + \frac{16\eta^2\tau\beta^2K^2}{nq} + \frac{4(1+\beta\eta)(\mathcal{B}^2/q + \sigma^2d)}{\eta^2K}. \quad (6)$$

When we select  $\eta = O(\frac{1}{\sqrt{TK}})$  and  $K = \Theta(T)$ , for  $(\epsilon, \delta)$ -DP we have that

$$\mathbb{E}\left[\frac{\sum_{t=1}^T \|\nabla F(\bar{w}^{(t-1)})\|^2}{T}\right] = \tilde{O}\left(\frac{F(\bar{w}^{(0)})}{T} + \frac{\tau}{nq} + \frac{\mathcal{B}^2T}{q} + \frac{d}{n^2\epsilon^2}\right). \quad (7)$$

The proof can be found in Appendix E. For the analysis of DP-LSGD in non-convex optimization, we do *not* need Assumption 4.2 on the similarity among local functions and Theorem 4.2 is simply obtained by substituting the clipping error from each phase into Theorem 3.2. To have a more clear picture, we still consider a practical scenario when  $\mathcal{B} = \mathcal{B}_0 \cdot \eta$  for some constant  $\mathcal{B}_0$  and the variance  $\tau$  is also some constant. Then, from (7) we have that

$$\mathbb{E}\left[\frac{\sum_{t=1}^T \|\nabla F(\bar{w}^{(t-1)})\|^2}{T}\right] = O\left(\frac{F(\bar{w}^{(0)})}{T} + \frac{1}{nq} + \frac{\mathcal{B}_0^2}{q} + \frac{d}{n^2\epsilon^2}\right) = \tilde{O}\left(\frac{1}{T} + \frac{1}{q} + \frac{d}{n^2\epsilon^2}\right).$$

In other words, similar to the convex case, DP-LSGD will converge at a rate of  $O(1/T)$  to an  $\tilde{O}(1 + d/(n^2\epsilon^2))$  neighborhood of a saddle point given some constant sampling rate  $q$ . As a comparison, for DP-SGD when  $K = 1$ , from Theorem 3.2 we can only ensure an  $O(1/\sqrt{T})$  convergence rate to a same  $\tilde{O}(1 + d/(n^2\epsilon^2))$  neighborhood.

## 5 Why DP-LSGD Produces Less Bias and Better SNR

Throughout the previous section, we showed that asymptotically DP-LSGD enjoys a faster convergence rate to a neighborhood of (global/local) optimum compared to DP-SGD. We characterized the clipping bias mainly based on the second moment upper bound  $\mathcal{B}^2$  of the incremental norm  $\Psi_i^{(t)}$  of local updates. In this section, we proceed to empirically study the  $\Psi_i^{(t)}$ , and the tradeoff between clipping bias and DP (Gaussian) noise in practical deep learning tasks. We will explain why DP-LSGD could produce smaller bias and enable more efficient clipping compared to DP-SGD.

To produce good utility-privacy tradeoff, a proper selection of the clipping threshold  $c$  is important. Many existing works are devoted to optimizing the selection of  $c$  by either grid searching [35] or adaptive fine-tuning [44]. A smaller  $c$  requires less DP noise. But, as a tradeoff shown in Theorem 4.1 and 4.2, a smaller  $c$  and a consequently a larger  $\mathcal{B}$  will also lead to a heavier clipping bias. Thus, from the perspective of signal-to-noise ratio (SNR), an ideal scenario is that the  $l_2$ -norm of each local update is *concentrated* such that we can maximize the efficiency of the clipping power  $c$  with a small clipping effect for most local updates. Interpreted via our developed theory of clipping bias, it is expected that given the clipping threshold  $c$ , the incremental norm  $\Psi_i^{(t)}$  would be small, captured by  $\mathcal{B}$  in (5) and (7). In Fig. 1 (a,b), we plot various statistics of the incremental norm  $\Psi_i^{(t)}$  for DP-LSGD and DP-SGD, respectively, on training CIFAR10 [45]. By our analysis, DP-LSGD usually should apply a smaller learning rate  $\eta$ . To have a fair comparison, we consider the normalized



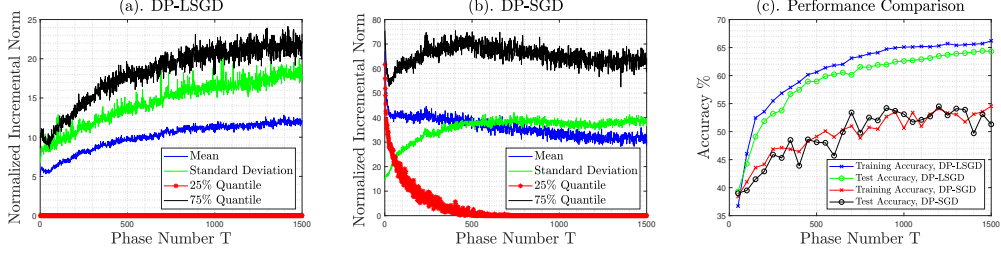

Figure 1: Training ResNet 20 on CIFAR10 with DP-LSGD ( $K = 10, \eta = 0.025, c = 1$ ) and DP-SGD ( $K = 1, \eta = 1, c = 1$ ) under  $(\epsilon = 2, \delta = 10^{-5})$ -DP, with expected batch size 1000.

incremental norm  $\Psi_i^{(t)}/\eta$ . Given the same clipping threshold, comparing Fig. 1 (a) and (b), the mean of normalized incremental norm, captured by  $\mathcal{B}/\eta$  in our theorems, of DP-LSGD is only around 32% of that of DP-SGD. The corresponding standard deviation is around only 40% of that of DP-SGD. One may also compare the 25% and 75% quantiles, which suggest that more local updates bear less clipping influence in DP-LSGD, thus enjoying a higher clipping efficiency. We also report the comparison when training ResNet20 [46] on SVHN [47] in Fig. 2 in Appendix F with similar observations. Details of experiment setups and the anonymous GitHub code link can be found in Appendix F.

| Dataset and Method \ $\epsilon$ | 1.5               | 2.0               | 2.5               | 3.0               | 3.5               | 4.0               |
|---------------------------------|-------------------|-------------------|-------------------|-------------------|-------------------|-------------------|
| CIFAR10, DP-LSGD ( $K = 10$ )   | 59.4( $\pm 0.5$ ) | 64.0( $\pm 0.3$ ) | 66.2( $\pm 0.4$ ) | 67.7( $\pm 0.3$ ) | 68.7( $\pm 0.2$ ) | 69.9( $\pm 0.3$ ) |
| CIFAR10, DP-SGD ( $K = 1$ )     | 49.8( $\pm 1.2$ ) | 58.7( $\pm 1.0$ ) | 59.9( $\pm 1.2$ ) | 60.6( $\pm 0.8$ ) | 62.1( $\pm 0.6$ ) | 62.8( $\pm 0.6$ ) |
| SVHN, DP-LSGD ( $K = 10$ )      | 83.2( $\pm 0.4$ ) | 84.4( $\pm 0.5$ ) | 85.7( $\pm 0.5$ ) | 85.4( $\pm 0.4$ ) | 86.1( $\pm 0.4$ ) | 86.5( $\pm 0.3$ ) |
| SVHN, DP-SGD ( $K = 1$ )        | 74.5( $\pm 0.8$ ) | 78.2( $\pm 0.6$ ) | 79.8( $\pm 0.6$ ) | 80.3( $\pm 1.0$ ) | 81.7( $\pm 0.4$ ) | 82.2( $\pm 0.5$ ) |

Table 1: **Test Accuracy** of ResNet20 on CIFAR10 and SVHN via DP-LSGD and DP-SGD under various  $\epsilon$  and fixed  $\delta = 10^{-5}$ , with expected batch size 1000.

In Fig.1 (c), we record the performance of DP-LSGD and DP-SGD, which coincides with our theory that DP-LSGD has a smaller clipping bias and a faster convergence rate. The smaller incremental norm in DP-LSGD is not surprising. With relatively larger  $K$ , for each individual function  $f_i(w)$ , though the  $K$  local gradients are correlated and essentially determined by a single sample, their aggregation still averages out substantial sampling noise and makes the  $l_2$ -norm of local updates more concentrated. In Table 1, we include additional comparison between their performance on CIFAR10 [45] and SVHN [47]; DP-LSGD produces significant improvements.

## 6 Conclusion and Prospects

In this paper, via LSGD, we provide a unified analysis of the clipping bias and the utility loss in privacy-preserving gradient methods for both centralized and distributed setups. Provided the generic analysis, we develop the connections between the bias and the second moment of local updates. This initializes a new direction to systematically instruct private learning by connecting the research of variance reduction in distributed optimization. In this paper we only focus on regular LSGD to show its advantage over DP-SGD, but advanced acceleration methods [30, 31, 43] are known in non-private federated learning to further reduce the “local-update drift” caused by (per-sample) data heterogeneity. This could then further reduce the clipping bias given local updates of smaller variance. Thus, a promising future direction is to understand and incorporate those techniques within the sensitivity control framework. Another important issue we have not fully explored is the software implementation of DP-LSGD in the centralized case. For DP-SGD, many PyTorch libraries with fast per-sample gradient computation in low memory overhead have been developed, such as Opacus [48]. However, in all above-presented experiments, we simulate DP-LSGD in a distributed environment and compute each local update in parallel at a cost of large memory. Given limited hardware resources, this restricts the application of larger batchsize (tens of thousands) and deploying deeper neural networks, which are known to produce much better utility-privacy tradeoffs [36, 49]. We leave empirical efficiency improvement to future work.

## References

- [1] Sebastian Urban Stich. Local sgd converges fast and communicates little. In *ICLR 2019-International Conference on Learning Representations*, number CONF, 2019.
- [2] Ahmed Khaled, Konstantin Mishchenko, and Peter Richtárik. Tighter theory for local sgd on identical and heterogeneous data. In *International Conference on Artificial Intelligence and Statistics*, pages 4519–4529. PMLR, 2020.
- [3] Cynthia Dwork, Frank McSherry, Kobbi Nissim, and Adam Smith. Calibrating noise to sensitivity in private data analysis. In *Theory of Cryptography: Third Theory of Cryptography Conference, TCC 2006, New York, NY, USA, March 4-7, 2006. Proceedings 3*, pages 265–284. Springer, 2006.
- [4] Graham Cormode, Somesh Jha, Tejas Kulkarni, Ninghui Li, Divesh Srivastava, and Tianhao Wang. Privacy at scale: Local differential privacy in practice. In *Proceedings of the 2018 International Conference on Management of Data*, pages 1655–1658, 2018.
- [5] Robin C Geyer, Tassilo Klein, and Moin Nabi. Differentially private federated learning: A client level perspective. *arXiv preprint arXiv:1712.07557*, 2017.
- [6] Jakub Konečný, H Brendan McMahan, Felix X Yu, Peter Richtárik, Ananda Theertha Suresh, and Dave Bacon. Federated learning: Strategies for improving communication efficiency. *arXiv preprint arXiv:1610.05492*, 2016.
- [7] Tao Lin, Sebastian U Stich, Kumar Kshitij Patel, and Martin Jaggi. Don’t use large mini-batches, use local sgd. In *International Conference on Learning Representations*, 2020.
- [8] Cynthia Dwork. Differential privacy. In *Automata, Languages and Programming: 33rd International Colloquium, ICALP 2006, Venice, Italy, July 10-14, 2006, Proceedings, Part II 33*, pages 1–12. Springer, 2006.
- [9] Jinshuo Dong, Aaron Roth, and Weijie J Su. Gaussian differential privacy. *Journal of the Royal Statistical Society Series B: Statistical Methodology*, 84(1):3–37, 2022.
- [10] Cynthia Dwork, Aaron Roth, et al. The algorithmic foundations of differential privacy. *Foundations and Trends® in Theoretical Computer Science*, 9(3–4):211–407, 2014.
- [11] Xiaokui Xiao and Yufei Tao. Output perturbation with query relaxation. *Proceedings of the VLDB Endowment*, 1(1):857–869, 2008.
- [12] Cynthia Dwork, Guy N Rothblum, and Salil Vadhan. Boosting and differential privacy. In *2010 IEEE 51st Annual Symposium on Foundations of Computer Science*, pages 51–60. IEEE, 2010.
- [13] Shuang Song, Kamalika Chaudhuri, and Anand D Sarwate. Stochastic gradient descent with differentially private updates. In *2013 IEEE global conference on signal and information processing*, pages 245–248. IEEE, 2013.
- [14] Martin Abadi, Andy Chu, Ian Goodfellow, H Brendan McMahan, Ilya Mironov, Kunal Talwar, and Li Zhang. Deep learning with differential privacy. In *Proceedings of the 2016 ACM SIGSAC conference on computer and communications security*, pages 308–318, 2016.
- [15] Xiangyi Chen, Steven Z Wu, and Mingyi Hong. Understanding gradient clipping in private sgd: A geometric perspective. *Advances in Neural Information Processing Systems*, 33:13773–13782, 2020.
- [16] Xinwei Zhang, Xiangyi Chen, Mingyi Hong, Zhiwei Steven Wu, and Jinfeng Yi. Understanding clipping for federated learning: Convergence and client-level differential privacy. In *International Conference on Machine Learning, ICML 2022*, 2022.
- [17] Debraj Basu, Deepesh Data, Can Karakus, and Suhas Diggavi. Qsparse-local-sgd: Distributed sgd with quantization, sparsification and local computations. *Advances in Neural Information Processing Systems*, 32, 2019.

- [18] Hao Yu, Rong Jin, and Sen Yang. On the linear speedup analysis of communication efficient momentum sgd for distributed non-convex optimization. In *International Conference on Machine Learning*, pages 7184–7193. PMLR, 2019.
- [19] Jianyu Wang and Gauri Joshi. Cooperative sgd: A unified framework for the design and analysis of local-update sgd algorithms. *The Journal of Machine Learning Research*, 22(1):9709–9758, 2021.
- [20] Farzin Haddadpour and Mehrdad Mahdavi. On the convergence of local descent methods in federated learning. *arXiv preprint arXiv:1910.14425*, 2019.
- [21] Blake Woodworth, Kumar Kshitij Patel, Sebastian Stich, Zhen Dai, Brian Bullins, Brendan McMahan, Ohad Shamir, and Nathan Srebro. Is local sgd better than minibatch sgd? In *International Conference on Machine Learning*, pages 10334–10343. PMLR, 2020.
- [22] Huang Fang, Xiaoyun Li, Chenglin Fan, and Ping Li. Improved convergence of differential private sgd with gradient clipping. In *International Conference on Learning Representations 2023*.
- [23] Xiaodong Yang, Huishuai Zhang, Wei Chen, and Tie-Yan Liu. Normalized/clipped sgd with perturbation for differentially private non-convex optimization. *arXiv preprint arXiv:2206.13033*, 2022.
- [24] LO Mangasarian. Parallel gradient distribution in unconstrained optimization. *SIAM Journal on Control and Optimization*, 33(6):1916–1925, 1995.
- [25] Ryan McDonald, Keith Hall, and Gideon Mann. Distributed training strategies for the structured perceptron. In *Human language technologies: The 2010 annual conference of the North American chapter of the association for computational linguistics*, pages 456–464, 2010.
- [26] Fan Zhou and Guojing Cong. On the convergence properties of a  $k$ -step averaging stochastic gradient descent algorithm for nonconvex optimization. *arXiv preprint arXiv:1708.01012*, 2017.
- [27] Shiqiang Wang, Tiffany Tuor, Theodoros Salonidis, Kin K Leung, Christian Makaya, Ting He, and Kevin Chan. When edge meets learning: Adaptive control for resource-constrained distributed machine learning. In *IEEE INFOCOM 2018-IEEE conference on computer communications*, pages 63–71. IEEE, 2018.
- [28] Anastasia Koloskova, Nicolas Loizou, Sadra Boreiri, Martin Jaggi, and Sebastian Stich. A unified theory of decentralized sgd with changing topology and local updates. In *International Conference on Machine Learning*, pages 5381–5393. PMLR, 2020.
- [29] Kevin Hsieh, Amar Phanishayee, Onur Mutlu, and Phillip Gibbons. The non-iid data quagmire of decentralized machine learning. In *International Conference on Machine Learning*, pages 4387–4398. PMLR, 2020.
- [30] Sai Praneeth Karimireddy, Satyen Kale, Mehryar Mohri, Sashank Reddi, Sebastian Stich, and Ananda Theertha Suresh. Scaffold: Stochastic controlled averaging for federated learning. In *International Conference on Machine Learning*, pages 5132–5143. PMLR, 2020.
- [31] Farzin Haddadpour, Mohammad Mahdi Kamani, Aryan Mokhtari, and Mehrdad Mahdavi. Federated learning with compression: Unified analysis and sharp guarantees. In *International Conference on Artificial Intelligence and Statistics*, pages 2350–2358. PMLR, 2021.
- [32] Raef Bassily, Adam Smith, and Abhradeep Thakurta. Private empirical risk minimization: Efficient algorithms and tight error bounds. In *2014 IEEE 55th annual symposium on foundations of computer science*, pages 464–473. IEEE, 2014.
- [33] Raef Bassily, Vitaly Feldman, Kunal Talwar, and Abhradeep Guha Thakurta. Private stochastic convex optimization with optimal rates. *Advances in neural information processing systems*, 32, 2019.
- [34] Nicolas Papernot, Abhradeep Thakurta, Shuang Song, Steve Chien, and Úlfar Erlingsson. Tempered sigmoid activations for deep learning with differential privacy. In *Proceedings of the AAAI Conference on Artificial Intelligence*, volume 35, pages 9312–9321, 2021.

- [35] Florian Tramer and Dan Boneh. Differentially private learning needs better features (or much more data). In *International Conference on Learning Representations*, 2021.
- [36] Soham De, Leonard Berrada, Jamie Hayes, Samuel L Smith, and Borja Balle. Unlocking high-accuracy differentially private image classification through scale. *arXiv preprint arXiv:2204.13650*, 2022.
- [37] Yuqing Zhu and Yu-Xiang Wang. Poission subsampled rényi differential privacy. In *International Conference on Machine Learning*, pages 7634–7642. PMLR, 2019.
- [38] Martin Abadi, Andy Chu, Ian Goodfellow, H Brendan McMahan, Ilya Mironov, Kunal Talwar, and Li Zhang. Deep learning with differential privacy. In *Proceedings of the 2016 ACM SIGSAC conference on computer and communications security*, pages 308–318, 2016.
- [39] Naman Agarwal, Ananda Theertha Suresh, Felix Xinnan X Yu, Sanjiv Kumar, and Brendan McMahan. cpsgd: Communication-efficient and differentially-private distributed sgd. *Advances in Neural Information Processing Systems*, 31, 2018.
- [40] Tong Zhang. Solving large scale linear prediction problems using stochastic gradient descent algorithms. In *Proceedings of the twenty-first international conference on Machine learning*, page 116, 2004.
- [41] Ohad Shamir and Tong Zhang. Stochastic gradient descent for non-smooth optimization: Convergence results and optimal averaging schemes. In *International conference on machine learning*, pages 71–79. PMLR, 2013.
- [42] Xiaoyu Li and Francesco Orabona. On the convergence of stochastic gradient descent with adaptive stepsizes. In *The 22nd international conference on artificial intelligence and statistics*, pages 983–992. PMLR, 2019.
- [43] Aritra Mitra, Rayana Jaafar, George J Pappas, and Hamed Hassani. Linear convergence in federated learning: Tackling client heterogeneity and sparse gradients. *Advances in Neural Information Processing Systems*, 34:14606–14619, 2021.
- [44] Galen Andrew, Om Thakkar, Brendan McMahan, and Swaroop Ramaswamy. Differentially private learning with adaptive clipping. *Advances in Neural Information Processing Systems*, 34:17455–17466, 2021.
- [45] Alex Krizhevsky, Geoffrey Hinton, et al. Learning multiple layers of features from tiny images. 2009.
- [46] Kaiming He, Xiangyu Zhang, Shaoqing Ren, and Jian Sun. Deep residual learning for image recognition. In *Proceedings of the IEEE conference on computer vision and pattern recognition*, pages 770–778, 2016.
- [47] Yuval Netzer, Tao Wang, Adam Coates, Alessandro Bissacco, Bo Wu, and Andrew Y Ng. Reading digits in natural images with unsupervised feature learning. 2011.
- [48] Ashkan Yousefpour, Igor Shilov, Alexandre Sablayrolles, Davide Testuggine, Karthik Prasad, Mani Malek, John Nguyen, Sayan Ghosh, Akash Bharadwaj, Jessica Zhao, et al. Opacus: User-friendly differential privacy library in pytorch. *arXiv preprint arXiv:2109.12298*, 2021.
- [49] Florian A Hölzl, Daniel Rueckert, and Georgios Kaissis. Equivariant differentially private deep learning. *arXiv preprint arXiv:2301.13104*, 2023.
- [50] Moritz Hardt, Ben Recht, and Yoram Singer. Train faster, generalize better: Stability of stochastic gradient descent. In *International conference on machine learning*, pages 1225–1234. PMLR, 2016.

## A Proof of Theorem 3.1: Last-iterate Convergence of Noisy LSGD in General Convex Optimization

We first present a sketch of the proof. There are two main challenges to derive the last-iterate convergence of LSGD with unbounded gradients. First, to derive the last-iterate guarantee, we need to keep track of the progress of  $F(\bar{w}^{(t)}) - F(\bar{w}^{(t')})$  for different  $t$  and  $t'$ . To support this, we still adopt the similar idea from existing works [2, 26] to consider a virtual sequence determined by the average of all intermediate updates assuming all users participate in the  $t$ -th phase, i.e.,  $\tilde{w}^{(t,k)} = \frac{1}{n} \cdot \sum_{i=1}^n w_i^{(t,k)}$ . But instead, we show a more generic analysis on  $F(\tilde{w}^{(t,k)}) - F(u)$  for arbitrary  $u$  and a careful characterization of the difference between  $F(\tilde{w}^{(t,k)})$  and  $F(\bar{w}^{(t)})$  under sampling, given that  $\bar{w}^{(t)}$  is the actual and only release. The second and more challenging problem is that we cannot straightforwardly apply classic last-iterate convergence analyses [40, 41, 42] which must count on the assumption of bounded gradient. To address this, in the proof, we alternatively use the following two kinds of upper bounds on the gradient norm

$$\|\nabla F(w)\|^2 = \|\nabla F(w) - \nabla F(w^*)\|^2 \leq \min\{\beta^2 \|w - w^*\|^2, 2\beta(F(w) - F(w^*))\},$$

which is based on the property of smoothness and convexity. With a careful analysis on  $\|\tilde{w}^{(t,k)} - w^*\|^2$  for any  $t$  and  $k$ , we propose a more generic last-iterate framework to handle unbounded and heterogeneous local update, simultaneously.

### A.1 Main Proof

Before the start, we define a virtual sequence  $\hat{w}^{(t,k)} = \bar{w}^{(t-1)} + \frac{1}{nq} \sum_{i=1}^n 1_i^{(t)} (w_i^{(t,k)} - \bar{w}^{(t-1)})$  for those intermediate iterates produced by the users selected in the  $t$ -th phase.  $1_i^{(t)}$  is an indicator which equals 1 iff the  $i$ -th user is selected in the  $t$ -th phase. Meanwhile, we imagine the scenario that all users participate in the  $t$ -th phase computation and a sequence of intermediate iterates  $w_i^{(t,k)}$  for  $i = 1, 2, \dots, n$ , and  $k = 1, 2, \dots, K$ , is produced. We use  $\tilde{w}^{(t,k)} = \frac{1}{n} \cdot \sum_{i=1}^n w_i^{(t,k)}$  to denote the average. It is not hard to observe that  $\mathbb{E}[\hat{w}^{(t,k)}] = \tilde{w}^{(t,k)}$  conditional on  $\bar{w}^{(t-1)}$ . Moreover,  $w_i^{(t,0)} = \tilde{w}^{(t,0)} = \bar{w}^{(t-1)}$  for  $i = 1, 2, \dots, n$ . In the following, we unravel  $\|\tilde{w}^{(t,k)} - u\|^2$  for arbitrary  $u$  and obtain

$$\begin{aligned} \|\hat{w}^{(t,k)} - u\|^2 &= \|\hat{w}^{(t,k-1)} - u\|^2 - \frac{\eta}{nq} \sum_{i=1}^n 1_i^{(t)} \nabla f_i(w_i^{(t,k-1)}) \cdot \langle \hat{w}^{(t,k-1)} - u, \nabla f_i(w_i^{(t,k-1)}) \rangle \\ &= \|\hat{w}^{(t,k-1)} - u\|^2 - \frac{2}{nq} \cdot \sum_{i=1}^n \eta 1_i^{(t)} \cdot \langle \hat{w}^{(t,k-1)} - u, \nabla f_i(w_i^{(t,k-1)}) \rangle + \left\| \frac{\sum_{i=1}^n \eta 1_i^{(t)} \nabla f_i(w_i^{(t,k-1)})}{nq} \right\|^2. \end{aligned} \quad (8)$$

We first work on the last term  $\left\| \frac{\sum_{i=1}^n \eta 1_i^{(t)} \nabla f_i(w_i^{(t,k-1)})}{nq} \right\|^2$  in (8).

**Lemma A.1.** *Conditional on  $\bar{w}^{(t-1)}$ ,*

$$\begin{aligned} \mathbb{E} \left[ \left\| \frac{\sum_{i=1}^n \eta 1_i^{(t)} \nabla f_i(w_i^{(t,k-1)})}{nq} \right\|^2 \right] &\leq \frac{10\eta^2 \beta^2}{n} \sum_{i=1}^n \|w_i^{(t,k-1)} - \tilde{w}^{(t,k-1)}\|^2 + \frac{6\eta^2 \tau}{nq} \\ &\quad + 10\eta^2 \min\{2\beta(F(\tilde{w}^{(t,k-1)}) - F(w^*)), \beta^2 \|\tilde{w}^{(t,k-1)} - w^*\|^2\}. \end{aligned} \quad (9)$$

519

Now, we move our focus to the second term  $-\frac{2}{nq} \cdot \sum_{i=1}^n \eta 1_i^{(t)} \cdot \langle \hat{w}^{(t,k-1)} - u, \nabla f_i(w_i^{(t,k-1)}) \rangle$  of (8).

**Lemma A.2.** *Conditional on  $\bar{w}^{(t-1)}$ ,*

$$\begin{aligned} \mathbb{E} \left[ -\frac{2}{nq} \cdot \sum_{i=1}^n \eta 1_i^{(t)} \langle \hat{w}^{(t,k-1)} - u, \nabla f_i(w_i^{(t,k-1)}) \rangle \right] \\ \leq 2\eta(F(u) - F(\tilde{w}^{(t,k-1)})) + \frac{\beta}{2n} \sum_{i=1}^n \|w_i^{(t,k-1)} - \tilde{w}^{(t,k-1)}\|^2. \end{aligned} \quad (10)$$

522

523 Finally, we consider the upper bound of  $\sum_{i=1}^n \|w_i^{(t,k-1)} - \tilde{w}^{(t,k-1)}\|^2$ .

524 **Lemma A.3.** When  $\eta < \frac{\beta}{\sqrt{24K}}$ ,

$$\sum_{i=1}^n \|w_i^{(t,k)} - \tilde{w}^{(t,k)}\|^2 \leq 4k^2 n \tau \eta^2. \quad (11)$$

525

526 Now, we combine Lemma A.1, A.2 and A.3 together and go back to (8). On one hand, when we  
527 adopt the upper bound of Lemma A.1 using  $F(\tilde{w}^{(t,k)}) - F(w^*)$ , we have

$$\begin{aligned} \mathbb{E}[\|\hat{w}^{(t,k)} - u\|^2] &\leq \mathbb{E}[\|\hat{w}^{(t,k-1)} - u\|^2 + 20\eta^2 \beta (F(\tilde{w}^{(t,k-1)}) - F(w^*)) + 2\eta(F(u) - F(\tilde{w}^{(t,k-1)})) \\ &\quad + \frac{6\eta^2 \tau}{nq} + (10\eta^2 \beta^2 + \beta\eta) \cdot 4k^2 \tau \eta^2]. \end{aligned} \quad (12)$$

528 Sum up (12) on both sides from  $k = 1, 2, \dots, K$ , and we have that

$$\begin{aligned} \mathbb{E}[\sum_{k=1}^K 2\eta(F(\tilde{w}^{(t,k-1)}) - F(u)) - 20\eta^2 \beta (F(\tilde{w}^{(t,k-1)}) - F(w^*))] \\ \leq \mathbb{E}[\|\tilde{w}^{(t-1)} - u\|^2 - \|\hat{w}^{(t,K)} - u\|^2] + \frac{6K\eta^2 \tau}{nq} + (10\eta^2 \beta^2 + \beta\eta) \cdot 4K^3 \tau \eta^2. \end{aligned} \quad (13)$$

When  $u = w^*$ , it is noted that the left side of (13) becomes

$$\mathbb{E}[\sum_{k=1}^K (2\eta - 20\eta^2 \beta)(F(\tilde{w}^{(t,k-1)}) - F(w^*))],$$

529 and once  $\eta$  is small enough such that  $2(\eta - 10\eta^2 \beta) > 0$  where  $\eta < 1/(10\beta)$ , then the above is  
530 non-negative. In the following, we further take the perturbation  $Q^{(t)}$  into account. It is noted that

$$\mathbb{E}[\|\tilde{w}^{(t)} - u\|^2] = \mathbb{E}[\|\hat{w}^{(t,K)} + Q^{(t)} - u\|^2] = \mathbb{E}[\|\hat{w}^{(t,K)} - u\|^2] + \mathbb{E}[\|Q^{(t)}\|^2], \quad (14)$$

531 since  $Q^{(t)}$  is independent zero-mean noise. Therefore, when we further sum up (13) for  $t =$   
532  $1, 2, \dots, T$  combined with (14),

$$\begin{aligned} \mathbb{E}[\frac{\sum_{t=1}^T \sum_{k=1}^K F(\tilde{w}^{(t,k)}) - F(w^*)}{TK}] \\ \leq \frac{\|\tilde{w}^{(0)} - w^*\|^2}{(2\eta - 20\eta^2 \beta)TK} + \frac{(6\eta^2 \tau / (nq) + (10\eta^2 \beta^2 + \beta\eta) \cdot 4K^2 \tau \eta^2) + \bar{Q}/K}{(2\eta - 20\eta^2 \beta)}. \end{aligned} \quad (15)$$

533 Here, as assumed  $\mathbb{E}[\|Q^{(t)}\|^2] \leq \bar{Q}$ . When  $\eta < 1/(20\beta)$ , which suggests that  $(2\eta - 20\eta^2 \beta) \geq \eta$  and  
534  $(10\eta^2 \beta^2 + \beta\eta) \leq 2\beta\eta$ , respectively, (15) can be simplified as

$$\mathbb{E}[\frac{\sum_{t=1}^T \sum_{k=1}^K F(\tilde{w}^{(t,k)}) - F(w^*)}{TK}] \leq \frac{\|\tilde{w}^{(0)} - w^*\|^2}{\eta TK} + (\frac{6\eta \tau}{nq} + 8\beta K^2 \tau \eta^2) + \bar{Q}/(\eta K) \quad (16)$$

535 On the other hand, when we apply Lemma A.1 in (12) if we adopt the form  $\beta^2 \|\tilde{w}^{(t,k-1)} - w^*\|^2$  as  
536 the upper bound, we have

$$\begin{aligned} \mathbb{E}[\|\hat{w}^{(t,k)} - u\|^2] &\leq \mathbb{E}[\|\hat{w}^{(t,k-1)} - u\|^2 + 10\eta^2 \beta^2 \|\tilde{w}^{(t,k-1)} - w^*\|^2 + 2\eta(F(u) - F(\tilde{w}^{(t,k-1)})) \\ &\quad + \frac{6\eta^2 \tau}{nq} + (10\eta^2 \beta^2 + \beta\eta) \cdot 4k^2 \tau \eta^2]. \end{aligned} \quad (17)$$

537 With a similar reasoning, when  $\eta < 1/(20\beta)$ ,

$$\begin{aligned} \mathbb{E}[F(\tilde{w}^{(t,k-1)}) - F(u)] \\ \leq \mathbb{E}[\frac{\|\hat{w}^{(t,k-1)} - u\|^2 - \|\hat{w}^{(t,k)} - u\|^2}{2\eta} + 5\eta \beta^2 \|\tilde{w}^{(t,k-1)} - w^*\|^2 + \frac{3\eta \tau}{nq} + 4k^2 \beta \tau \eta^2]. \end{aligned} \quad (18)$$

538 However, to apply (18), we need an additional result to upper bound the term  $\|\tilde{w}^{(t,k-1)} - w^*\|$ ,  
539 summarized as the following lemma.

540 **Lemma A.4.** *With the initialization  $\bar{w}^{(0)}$ , when  $\eta < \min\{\frac{\beta}{\sqrt{24K}}, \frac{1}{20\beta}, \frac{1}{2\beta+3K\beta/(nq)}\}$ , for any  $k \in$   
541  $[0 : K - 1]$ ,*

$$\mathbb{E}[\|\tilde{w}^{(t,k)} - w^*\|] \leq \|\bar{w}^{(0)} - w^*\| + 8t\beta\eta^3 K^3 \tau + (t-1)(\bar{Q} + \frac{12K^4\beta^2\eta^4\tau + 3K^2\eta^2\tau}{nq}).$$

542

543 From Lemma A.4, we also have a global bound that for any  $t \in [1 : T]$  and  $k \in [0 : K]$ ,

$$\mathbb{E}[\|\tilde{w}^{(t,k)} - w^*\|] \leq \|\bar{w}^{(0)} - w^*\| + T(8\beta\eta^3 K^3 \tau + (\bar{Q} + \frac{12K^4\beta^2\eta^4\tau + 3K^2\eta^2\tau}{nq})). \quad (19)$$

544 Now, for any  $t_0 \in [1 : T]$  and  $k_0 \in [0 : K - 1]$ , if we select  $u = \tilde{w}^{(t_0, k_0)}$ , stemmed from (18),

$$\begin{aligned} \frac{\sum_{(t,k) \in \mathcal{C}} \mathbb{E}[F(\tilde{w}^{(t,k)}) - F(\tilde{w}^{(t_0, k_0)})]}{(T - t_0 + 1)K - k_0} &\leq 3\eta\tau/(nq) + 4K^2\beta\tau\eta^2 \\ &+ \frac{(T - t_0 + 1)\bar{Q}}{2\eta((T - t_0 + 1)K - k_0)} + \frac{5\eta\beta^2 \sum_{(t,k) \in \mathcal{C}} \mathbb{E}[\|\tilde{w}^{(t,k)} - w^*\|^2]}{(T - t_0 + 1)K - k_0}, \end{aligned} \quad (20)$$

545 where  $\mathcal{C} = ((t_0, k), k = k_0, \dots, K - 1) \cup ((t, k), t = t_0 + 1, \dots, T, k = 0, \dots, K - 1)$ . Finally,  
546 as we are concerning about the utility of  $\mathcal{F}(\bar{w}^{(T)})$ , we need to virtually implement one more gradient  
547 descent step on  $\bar{w}^{(T)}$  to get an upper bound of  $F(\bar{w}^{(T)}) - F(w^*)$ . To be specific, we imagine one  
548 additional full gradient descent using the entire set on  $\bar{w}^{(T)}$ , and for any  $u$ , we have that

$$\begin{aligned} \|\tilde{w}^{(T+1,1)} - u\|^2 &= \|\bar{w}^{(T)} - u - \eta \cdot \frac{\sum_{i=1}^n \nabla f_i(\bar{w}^{(T)})}{n}\|^2 \\ &\leq \|\bar{w}^{(T)} - u\|^2 - 2\eta(F(\bar{w}^{(T)}) - F(u)) + \eta^2 \|\nabla F(\bar{w}^{(T)}) - \nabla F(w^*)\|^2 \\ &\leq \|\bar{w}^{(T)} - u\|^2 - 2\eta(F(\bar{w}^{(T)}) - F(u)) + \min \eta^2 \{\beta^2 \|\bar{w}^{(T)} - w^*\|^2, 2\beta(F(\bar{w}^{(T)}) - F(w^*))\}. \end{aligned} \quad (21)$$

549 Therefore, let  $u = w^*$  and we can combine (16) and (21) to produce the following. Since we assume  
550  $(2\eta - 20\eta^2\beta) \geq \eta$  which also implies  $2(\eta - \eta^2\beta) \geq \eta$ , we have

$$\begin{aligned} &\mathbb{E}[\frac{\sum_{t=1}^T \sum_{k=1}^K (F(\tilde{w}^{(t,k-1)}) - F(w^*)) + (F(\bar{w}^{(T)}) - F(w^*))}{TK + 1}] \\ &\leq \frac{\|\bar{w}^{(0)} - w^*\|^2}{\eta(TK + 1)} + (\frac{6\eta\tau}{nq} + 8\beta K^2\tau\eta^2) + \bar{Q}/(\eta K). \end{aligned} \quad (22)$$

551 Similarly, for (20), it is noted that conditional on  $\bar{w}^{(t-1)}$ , we have that

$$\mathbb{E}[\|\hat{w}^{(t,k)} - u\|^2] = \mathbb{E}[\|\hat{w}^{(t,k)} - \tilde{w}^{(t,k)}\|^2] + \|\tilde{w}^{(t,k)} - u\|^2, \quad (23)$$

552 and for  $\mathbb{E}[\|\hat{w}^{(t,k)} - \tilde{w}^{(t,k)}\|^2]$  for any  $t$  and  $k$ ,

$$\begin{aligned} \mathbb{E}[\|\hat{w}^{(t,k)} - \tilde{w}^{(t,k)}\|^2] &= \mathbb{E}[\|(\hat{w}^{(t,k)} - \bar{w}^{(t-1)}) - (\tilde{w}^{(t,k)} - \bar{w}^{(t-1)})\|^2] \\ &= \eta^2 \mathbb{E}[\|\sum_{i=1}^n \frac{(\mathbf{1}^{(t)} - q)}{nq} \cdot \sum_{l=0}^{k-1} \nabla f_i(w_i^{(t,k)})\|^2] \leq \frac{\eta^2 k(q - q^2)}{n^2 q^2} \cdot \sum_{i=1}^n \sum_{l=0}^{k-1} \|\nabla f_i(w_i^{(t,l)})\|^2 \\ &= \frac{\eta^2 k(q - q^2)}{n^2 q^2} \cdot \sum_{i=1}^n \sum_{l=0}^{k-1} \|\nabla f_i(w_i^{(t,l)}) - \nabla f_i(\tilde{w}^{(t,l)}) + \nabla f_i(\tilde{w}^{(t,l)}) - F(\tilde{w}^{(t,l)}) + \nabla F(\tilde{w}^{(t,l)}) - \nabla F(w^*)\|^2 \\ &\leq \frac{3k\eta^2}{n^2 q} \cdot \sum_{i=1}^n \sum_{l=0}^{k-1} (\beta^2 \|w_i^{(t,l)} - \tilde{w}^{(t,l)}\|^2 + \beta^2 \|\tilde{w}^{(t,l)} - w^*\|^2 + \tau) \\ &\leq \frac{3K\eta^2}{nq} (4\beta^2 K^3 \tau \eta^2 + K\tau + \sum_{l=0}^{k-1} \beta^2 \|\tilde{w}^{(t,l)} - w^*\|^2). \end{aligned} \quad (24)$$

553 where the last line of (24) we apply Lemma A.4. Therefore, by replacing  $\mathbb{E}[\|\hat{w}^{(t,k)} - u\|^2]$  with  
 554  $\mathbb{E}[\|\hat{w}^{(t,k)} - \tilde{w}^{(t,k)}\|^2] + \|\tilde{w}^{(t,k)} - u\|^2$  in (18), we have that

$$\begin{aligned} \mathbb{E}[F(\tilde{w}^{(t,k-1)}) - F(u)] &\leq \mathbb{E}\left[\frac{\|\tilde{w}^{(t,k-1)} - u\|^2 - \|\tilde{w}^{(t,k)} - u\|^2 + \|\hat{w}^{(t,k-1)} - \tilde{w}^{(t,k-1)}\|^2 - \|\hat{w}^{(t,k)} - \tilde{w}^{(t,k-1)}\|^2}{2\eta}\right. \\ &\quad \left.+ 5\eta\beta^2\|\tilde{w}^{(t,k-1)} - w^*\|^2 + \frac{3\eta\tau}{nq} + 4K^2\beta\tau\eta^2\right]. \end{aligned} \quad (25)$$

555 Now, we let  $u = \tilde{w}^{(t_0,k_0)}$  in (21) and (25), combining (24) we have

$$\begin{aligned} &\frac{\sum_{t=t_0}^T \sum_{k=k_0}^{K-1} \mathbb{E}[F(\tilde{w}^{(t,k)}) - F(\tilde{w}^{(t_0,k_0)})] + \mathbb{E}[F(\bar{w}^{(T)}) - F(\tilde{w}^{(t_0,k_0)})]}{((T-t_0+1)K-k_0+1)} \\ &\leq 3\eta\tau/(nq) + 4K^2\beta\tau\eta^2 + \frac{(T-t_0+1)\bar{\mathcal{Q}}}{2\eta((T-t_0+1)K-k_0+1)} \\ &\quad + \frac{\frac{3K\eta}{nq}(4\beta^2K^3\tau\eta^2 + K\tau + \sum_{l=0}^{k-1}\beta^2\|\tilde{w}^{(t,l)} - w^*\|^2)}{2((T-t_0+1)K-k_0+1)} \\ &\quad + \frac{5\eta\beta^2(\sum_{t=t_0}^T \sum_{k=k_0+1}^K \mathbb{E}[\|\tilde{w}^{(t,k)} - w^*\|^2] + \mathbb{E}[\|\bar{w}^{(T)} - w^*\|^2])}{(T-t_0+1)K-k_0+1}. \end{aligned} \quad (26)$$

556 Now, we can apply the last-iterate convergence rate trick.

557 **Lemma A.5.** For any sequence  $y_i$ ,  $i = 1, 2, \dots, M$ ,

$$y_M = \frac{\sum_{j=1}^M y_j}{M} + \sum_{j=1}^{M-1} \frac{\sum_{l=M-j+1}^M (y_l - y_{M-j})}{j(j+1)} \quad (27)$$

558

559 One can easily verify the identity in Lemma A.5.

560 If we take  $y_j = \mathbb{E}[F(\tilde{w}^{(t,k)}) - F(w^*)]$  and  $z_j = \mathbb{E}[\|\tilde{w}^{(t,k)} - w^*\|^2]$ , for  $j = (t-1)K + k$  and let  
 561  $M = TK + 1$  where  $y_{TK+1} = \mathbb{E}[F(\bar{w}^{(T)}) - F(w^*)]$  and  $z_{TK+1} = \mathbb{E}[\|\bar{w}^{(T)} - w^*\|^2]$ , combined  
 562 with (22),(26) and Lemma A.5, we have that

$$y_{TK+1} = \mathbb{E}[F(\bar{w}^{(T)}) - F(w^*)] \quad (28)$$

$$= \frac{\sum_{j=1}^{TK} y_j}{TK+1} + \sum_{j=1}^{TK} \frac{1}{j+1} \cdot \frac{\sum_{l=TK+2-j}^{TK+1} (y_l - y_{TK+1-j})}{j} \quad (29)$$

$$\leq \left\{ \frac{\|\bar{w}^{(0)} - w^*\|^2}{\eta(TK+1)} + \left( \frac{6\eta\tau}{nq} + 8\beta K^2\tau\eta^2 + \bar{\mathcal{Q}}/(\eta K) \right) \right\} \quad (30)$$

$$+ \sum_{j=1}^{TK} \left\{ \frac{1}{j+1} \cdot \left( \frac{3\eta\tau}{nq} + 4\beta K^2\tau\eta^2 + \frac{\bar{\mathcal{Q}}}{2\eta} + \frac{12K^4\eta^3\beta^2\tau}{2nq} + \frac{3K^2\eta\tau}{2nq} + \frac{3K^2\eta}{nq} \max_l \{z_l\} \right) + 5\eta\beta^2 \frac{\sum_{l=TK-j+2}^{TK+1} z_l}{j(j+1)} \right\} \quad (31)$$

$$\leq \frac{\|\bar{w}^{(0)} - w^*\|^2}{\eta(TK+1)} + \log(TK+1) \left( \frac{6\eta\tau}{nq} + 8\beta K^2\tau\eta^2 + \bar{\mathcal{Q}}/\eta + \frac{12K^4\eta^3\beta^2\tau}{2nq} + \frac{3K^2\eta\tau}{2nq} + \frac{3K^2\eta}{nq} \max_l \{z_l\} \right) \quad (32)$$

$$+ (5\eta\beta^2) \sum_{j=1}^{TK} \left( \frac{1}{j} - \frac{1}{TK+1} \right) \cdot z_{TK-j+2} \quad (33)$$

563 In (30), we apply (22) on  $\frac{\sum_{j=1}^{TK} y_j}{TK+1}$ . In (31), we apply the results in (26) and  $\frac{(T-t_0+1)\bar{\mathcal{Q}}}{2\eta((T-t_0+1)K-k_0+1)} \leq$   
 564  $\frac{\bar{\mathcal{Q}}}{2\eta}$ , since the number of iterates is always no less than the number of synchronization in any time  
 565 interval. In (33), we use the fact that  $\sum_{j=1}^{TK} \frac{1}{j+1} \leq \log(TK+1)$  and as assumed  $\log(TK) \geq 2$ .



Now, with the assumption that  $K^2 = O(nq)$ , (33) can be further bounded as

$$y_{TK+1} < O(1) \cdot \left( \frac{\|\bar{w}^{(0)} - w^*\|^2}{\eta(TK+1)} + \log(TK+1) \left( \frac{\eta\tau}{nq} + K^2\tau\eta^2 + \bar{Q}/\eta + \tau\eta \right) + \eta \left( \sum_{j=1}^{TK} \frac{1}{j} \right) \cdot \max_l \{z_l\} \right) \quad (34)$$

$$\leq O(1) \cdot \left( \frac{\|\bar{w}^{(0)} - w^*\|^2}{\eta(TK+1)} + \log(TK+1) \left( \frac{\eta\tau}{nq} + K^2\tau\eta^2 + \bar{Q}/\eta + \tau\eta \right) \right) \quad (35)$$

$$+ \eta(\log(TK) + 1) (\|\bar{w}^{(0)} - w^*\|^2 + T(\beta\eta^3 K^3 \tau + \frac{K^4 \beta^2 \eta^4 \tau + K^2 \eta^2 \tau}{nq} + \bar{Q})). \quad (36)$$

In (36), we apply Lemma A.4 and (19). Thus, we complete the proof.

## A.2 Proof of Lemma A.1

Conditional on  $\bar{w}^{(t-1)}$ , we have that

$$\begin{aligned} & \mathbb{E} \left[ \left\| \frac{\sum_{i=1}^n \eta \mathbf{1}_i^{(t)} \nabla f_i(w_i^{(t,k-1)})}{nq} \right\|^2 \right] \\ &= \mathbb{E} \left[ \left\| \frac{\sum_{i=1}^n \eta \mathbf{1}_i^{(t)} \nabla f_i(w_i^{(t,k-1)})}{nq} - \frac{\sum_{i=1}^n \eta \nabla f_i(w_i^{(t,k-1)})}{n} + \frac{\sum_{i=1}^n \eta \nabla f_i(w_i^{(t,k-1)})}{n} \right\|^2 \right] \\ &\leq 2 \cdot \mathbb{E} \left[ \left\| \frac{\sum_{i=1}^n \eta (\mathbf{1}_i^{(t)} - q) \nabla f_i(w_i^{(t,k-1)})}{nq} \right\|^2 \right] + 2 \cdot \left\| \frac{\sum_{i=1}^n \eta \nabla f_i(w_i^{(t,k-1)})}{n} \right\|^2 \\ &= \frac{2(q - q^2) \sum_{i=1}^n \|\eta \nabla f_i(w_i^{(t,k-1)})\|^2}{(nq)^2} + 2 \cdot \left\| \frac{\sum_{i=1}^n \eta \nabla f_i(w_i^{(t,k-1)})}{n} \right\|^2 \\ &\leq \frac{2\eta^2 \sum_{i=1}^n \|\nabla f_i(w_i^{(t,k-1)})\|^2}{n^2 q} + 2\eta^2 \left\| \frac{\sum_{i=1}^n \nabla f_i(w_i^{(t,k-1)})}{n} \right\|^2. \end{aligned} \quad (37)$$

In the fourth line of (37), we use the fact that  $\mathbf{1}_{[1:n]}^{(t)}$  are i.i.d. Bernoulli variable of mean  $q$ , and thus  $\mathbb{E}[(\mathbf{1}_i^{(t)} - q)^2] = q(1 - q)$  and  $\mathbb{E}[(\mathbf{1}_i^{(t)} - q) \cdot (\mathbf{1}_j^{(t)} - q)] = 0$  for  $i \neq j$ . As for  $\sum_{i=1}^n \|\nabla f_i(w_i^{(t,k-1)})\|^2$ , we can further bound it as follows,

$$\sum_{i=1}^n \|\nabla f_i(w_i^{(t,k-1)}) - \nabla f_i(\tilde{w}^{(t,k-1)}) + \nabla f_i(\tilde{w}^{(t,k-1)}) - \nabla f_i(w^*) + \nabla f_i(w^*)\|^2 \quad (38)$$

$$\leq 3 \sum_{i=1}^n (\beta^2 \|w_i^{(t,k-1)} - \tilde{w}^{(t,k-1)}\|^2 + 2\beta \mathcal{D}_{f_i}(\tilde{w}^{(t,k-1)}, w^*) + \|\nabla f_i(w^*)\|^2) \quad (39)$$

$$\leq 3\beta^2 \sum_{i=1}^n \|w_i^{(t,k-1)} - \tilde{w}^{(t,k-1)}\|^2 + 6\beta n(F(\tilde{w}^{(t,k-1)}) - F(w^*)) + 3n\tau. \quad (40)$$

In (39), we apply AM-GM inequality again and use the property that for convex and  $\beta$ -smooth function  $f_i(w)$ , it holds that  $\|\nabla f_i(x) - \nabla f_i(y)\|^2 \leq 2\beta \mathcal{D}_{f_i}(x, y)$ , where  $\mathcal{D}_{f_i}(x, y) = f(x) - f(y) - \langle \nabla f(y), x - y \rangle$  is the Bregman divergence. In (40), we use the fact that  $\nabla F(w^*) = 0$  and due to Assumption 2.1, the variance  $\sum_{i=1}^n \|\nabla f_i(w^*) - \nabla F(w^*)\|^2 = \sum_{i=1}^n \|\nabla f_i(w^*)\|^2 \leq n\tau$ .

When we apply similar decomposition tricks in (40) to the term  $\left\| \frac{\sum_{i=1}^n \nabla f_i(w_i^{(t,k-1)})}{n} \right\|^2$ ,

$$\begin{aligned} & \left\| \frac{\sum_{i=1}^n \nabla f_i(w_i^{(t,k-1)})}{n} \right\|^2 \\ &\leq \left\| \frac{\sum_{i=1}^n \nabla f_i(w_i^{(t,k-1)}) - \nabla f_i(\tilde{w}^{(t,k-1)}) + \nabla f_i(\tilde{w}^{(t,k-1)}) - \nabla f_i(w^*) + \nabla f_i(w^*)}{n} \right\|^2 \\ &\leq 2 \left( \left\| \frac{\sum_{i=1}^n \nabla f_i(w_i^{(t,k-1)}) - \nabla f_i(\tilde{w}^{(t,k-1)})}{n} \right\|^2 + \left\| \frac{\sum_{i=1}^n \nabla f_i(\tilde{w}^{(t,k-1)}) - \nabla f_i(w^*)}{n} \right\|^2 \right) \\ &\leq \frac{2\beta^2 \sum_{i=1}^n \|w_i^{(t,k-1)} - \tilde{w}^{(t,k-1)}\|^2}{n} + 4\beta (F(\tilde{w}^{(t,k-1)}) - F(w^*)), \end{aligned}$$

578 since  $\nabla F(w^*) = \frac{1}{n} \cdot \sum_{i=1}^n \nabla f_i(w^*) = 0$ . Thus, (37) can be further bounded as follows:

$$\begin{aligned} & \mathbb{E} \left[ \left\| \frac{\sum_{i=1}^n \eta \mathbf{1}_i^{(t)} \nabla f_i(w_i^{(t,k-1)})}{nq} \right\|^2 \right] \\ & \leq \frac{10\eta^2 \beta^2}{n} \sum_{i=1}^n \|w_i^{(t,k-1)} - \tilde{w}^{(t,k-1)}\|^2 + 20\beta\eta^2 (F(\tilde{w}^{(t,k-1)}) - F(w^*)) + \frac{6\eta^2 \tau}{nq}. \end{aligned} \quad (41)$$

579 Here, we use the fact that  $q \geq 1/n$  and thus  $\frac{1}{n^2 q} \leq \frac{1}{n}$ . Meanwhile, it is noted that  $\|\nabla f_i(\tilde{w}^{(t,k-1)}) - \nabla f_i(w^*)\|^2$  can also be bounded by  $\beta^2 \|\tilde{w}^{(t,k-1)} - w^*\|^2$  alternatively due to the smooth assumption.  
 580 Thus, by replacing  $2\beta(F(\tilde{w}^{(t,k-1)}) - F(w^*))$  in (39) and (41) with  $\beta^2 \|\tilde{w}^{(t,k-1)} - w^*\|^2$ , we complete  
 581 the proof.  
 582

### 583 A.3 Proof of Lemma A.2

Based on the Poisson sampling assumption, conditional on  $\bar{w}^{(t-1)}$ ,

$$\mathbb{E} \left[ -\frac{2}{nq} \cdot \sum_{i=1}^n \eta \mathbf{1}_i^{(t)} \langle \tilde{w}^{(t,k-1)} - u, \nabla f_i(w_i^{(t,k-1)}) \rangle \right] = -\frac{2\eta}{n} \left[ \sum_{i=1}^n \langle \tilde{w}^{(t,k-1)} - u, \nabla f_i(w_i^{(t,k-1)}) \rangle \right].$$

584 For each  $i$ , it is noted that

$$\begin{aligned} & -\langle \tilde{w}^{(t,k-1)} - u, \nabla f_i(w_i^{(t,k-1)}) \rangle \\ & = -\langle w_i^{(t,k-1)} - u, \nabla f_i(w_i^{(t,k-1)}) \rangle - \langle \tilde{w}^{(t,k-1)} - w_i^{(t,k-1)}, \nabla f_i(w_i^{(t,k-1)}) \rangle \\ & \leq f_i(u) - f_i(w_i^{(t,k-1)}) + f_i(w_i^{(t,k-1)}) - f_i(\tilde{w}^{(t,k-1)}) + \frac{\beta}{2} \|w_i^{(t,k-1)} - \tilde{w}^{(t,k-1)}\|^2. \end{aligned} \quad (42)$$

In (42), we use the following facts. First, for smooth and convex function  $f_i$ ,  $\mathcal{D}_{f_i}(u, w_i^{(t,k-1)}) \geq 0$  and thus  $-\langle w_i^{(t,k-1)} - u, \nabla f_i(w_i^{(t,k-1)}) \rangle \leq f_i(u) - f_i(w_i^{(t,k-1)})$ . Second, for the term  $-\langle \tilde{w}^{(t,k-1)} - w_i^{(t,k-1)}, \nabla f_i(w_i^{(t,k-1)}) \rangle$ , we use the classic smooth inequality where

$$f_i(\tilde{w}^{(t,k-1)}) \leq f_i(w_i^{(t,k-1)}) + \langle \tilde{w}^{(t,k-1)} - w_i^{(t,k-1)}, \nabla f_i(w_i^{(t,k-1)}) \rangle + \frac{\beta}{2} \|w_i^{(t,k-1)} - \tilde{w}^{(t,k-1)}\|^2.$$

Therefore, by (42), we have that

$$-\frac{2\eta}{n} \left[ \sum_{i=1}^n \langle \tilde{w}^{(t,k-1)} - u, \nabla f_i(w_i^{(t,k-1)}) \rangle \right] \leq 2\eta (F(u) - F(\tilde{w}^{(t,k-1)})) + \frac{\beta}{2n} \sum_{i=1}^n \|w_i^{(t,k-1)} - \tilde{w}^{(t,k-1)}\|^2.$$

### 585 A.4 Proof of Lemma A.3

586 Given  $\bar{w}^{(t-1)}$ ,

$$\sum_{i=1}^n [\|w_i^{(t,k)} - \tilde{w}^{(t,k)}\|^2] = \eta^2 \sum_{i=1}^n \left[ \left\| \sum_{l=0}^{k-1} \nabla f_i(w_i^{(t,l)}) - \frac{\sum_{j=1}^n \sum_{l=0}^{k-1} \nabla f_j(w_j^{(t,l)})}{n} \right\|^2 \right] \quad (43)$$

$$\leq 3k\eta^2 \left[ \sum_{i=1}^n \sum_{l=0}^{k-1} (\|\nabla f_i(w_i^{(t,l)}) - \nabla f_i(\tilde{w}^{(t,l)})\|^2 + \|\nabla f_i(\tilde{w}^{(t,l)}) - \nabla F(\tilde{w}^{(t,l)})\|^2) \right] \quad (44)$$

$$+ \left\| \nabla F(\tilde{w}^{(t,l)}) - \frac{\sum_{j=1}^n \nabla f_j(w_j^{(t,l)})}{n} \right\|^2 \right] \quad (45)$$

$$\leq 3k\eta^2 \left[ \left( \sum_{i=1}^n \sum_{l=0}^{k-1} \beta^2 \|w_i^{(t,l)} - \tilde{w}^{(t,l)}\|^2 \right) + kn\tau + \sum_{i=1}^n \sum_{l=0}^{k-1} \frac{\beta^2 \|\tilde{w}^{(t,l)} - w_i^{(t,l)}\|^2}{n} \right] \quad (46)$$

$$\leq 3k\beta^2\eta^2(1 + 1/n) \sum_{i=1}^n \sum_{l=0}^{k-1} [\|w_i^{(t,l)} - \tilde{w}^{(t,l)}\|^2] + 3k^2n\tau\eta^2. \quad (47)$$

587 In (45), we use the fact that  $\|\sum_{i=1}^3 v_i\|^2 \leq 3\sum_{i=1}^3 \|v_i\|^2$ . In (46), we use Assumption 2.1 that the  
 588 variance of stochastic gradient is bounded by  $\tau$  and apply the form  $\nabla F(\tilde{w}^{(t,l)}) = \frac{\sum_{i=1}^n \nabla f_i(\tilde{w}^{(t,l)})}{n}$ .

Let  $M^{(k)} = \mathbb{E}[\sum_{i=1}^n \|w_i^{(t,k)} - \tilde{w}^{(t,k)}\|^2]$ . Then, from (47), when  $n \geq 1$ , we have an inequality in a form

$$M^{(k)} \leq \eta^2(6k\beta^2 \sum_{l=0}^{k-1} M^{(l)} + 3k^2 n \tau),$$

589 where  $M^{(0)} = \|\bar{w}^{(t-1)} - \bar{w}^{(t-1)}\|^2 = 0$ . It is not hard to verify that by induction, once  $\eta^2 < \frac{\beta^2}{24K^2}$ ,  
 590  $M^{(k)} \leq 4\eta^2 k^2 n \tau$ .

#### 591 A.5 Proof of Lemma A.4

To provide more intuition, we start from the case when  $t = 1$ ,  $\tilde{w}^{(t,0)} = \bar{w}^{(0)}$  and thus

$$\|\tilde{w}^{(1,k)} - w^*\|^2 = \|\tilde{w}^{(1,k-1)} - w^*\|^2 - 2\eta \left\langle \frac{\sum_{i=1}^n \nabla f_i(w_i^{(1,k-1)})}{n}, \tilde{w}^{(1,k-1)} - w^* \right\rangle + \eta^2 \left\| \frac{\sum_{i=1}^n \nabla f_i(w_i^{(1,k-1)})}{n} \right\|^2.$$

592 As a straightforward corollary of Lemma A.1, A.2 and A.3, we can obtain a similar upper bound in a  
 593 form once  $\eta < \min\{\frac{\beta}{\sqrt{24K}}, \frac{1}{2\beta}\}$

$$\begin{aligned} \|\tilde{w}^{(1,k)} - w^*\|^2 &\leq \|\tilde{w}^{(1,k-1)} - w^*\|^2 + 2\eta(F(w^*) - F(\tilde{w}^{(t,k-1)})) + \frac{\beta}{2n} \sum_{i=1}^n \|w^{(t,k-1)} - \tilde{w}^{(t,k-1)}\|^2 \\ &\quad + 2\eta^2 \left( \frac{\beta^2 \sum_{i=1}^n \|w_i^{(t,k-1)} - \tilde{w}^{(t,k-1)}\|^2}{n} + 2\beta F(\tilde{w}^{(t,k-1)}) - F(w^*) \right) \\ &\leq \|\tilde{w}^{(1,k-1)} - w^*\|^2 + 2(\eta - 2\beta\eta^2)(F(w^*) - F(\tilde{w}^{(t,k-1)})) + (\beta\eta + 2\beta^2\eta^2) \cdot 4\eta^2 K^2 \tau \\ &\leq \|\tilde{w}^{(1,k-1)} - w^*\|^2 + 2(\eta - 2\beta\eta^2)(F(w^*) - F(\tilde{w}^{(t,k-1)})) + 8\beta\eta^3 K^2 \tau. \end{aligned} \tag{48}$$

594 In (48), we apply Lemma A.3 and use the fact that  $\beta\eta + 2\beta^2\eta^2 \leq 2\beta\eta$ .

On the other hand, during the synchronization, it is noted that

$$\mathbb{E}[\bar{w}^{(1)}] = \mathbb{E}[\tilde{w}^{(1,K)} + Q^{(1)}] = \mathbb{E}[\tilde{w}^{(1,K)}].$$

Therefore,

$$\mathbb{E}[\|\bar{w}^{(1)} - w^*\|^2] = \mathbb{E}[\|\bar{w}^{(1)} - \tilde{w}^{(1,K)}\|^2] + \|\tilde{w}^{(1,K)} - w^*\|^2.$$

595 Moreover,

$$\begin{aligned} &\mathbb{E}[\|\bar{w}^{(1)} - \tilde{w}^{(1,K)}\|^2] \\ &= \mathbb{E}[\eta^2 \left\| \frac{\sum_{k=1}^K \sum_{i=1}^n (1_i^{(1)} - q) \nabla f_i(w_i^{(1,k-1)})}{nq} - Q^{(1)} \right\|^2] \\ &\leq \frac{K\eta^2 \sum_{k=1}^K \sum_{i=1}^n \|\nabla f_i(w_i^{(1,k-1)})\|^2}{n^2 q} + \bar{Q} \\ &\leq \frac{3K\eta^2 \sum_{k=1}^K \left\{ \sum_{i=1}^n (\beta^2 \|w_i^{(1,k-1)} - \tilde{w}^{(1,k-1)}\|^2) + 2\beta n(F(\tilde{w}^{(1,k-1)}) - F(w^*)) + n\tau \right\}}{n^2 q} + \bar{Q} \\ &\leq \frac{3K\eta^2 (4\beta^2\eta^2 K^3 n \tau + 2\beta n \sum_{k=1}^K (F(\tilde{w}^{(1,k-1)}) - F(w^*)) + K n \tau)}{n^2 q} + \bar{Q} \\ &= \frac{12K^4 \beta^2 \eta^4 \tau + 6K\beta\eta^2 \sum_{k=1}^K (F(\tilde{w}^{(1,k-1)}) - F(w^*)) + 3K^2 \eta^2 \tau}{nq} + \bar{Q}. \end{aligned} \tag{49}$$

596 In the fifth line of (49), we apply Lemma A.3. From (48),

$$\|\tilde{w}^{(1,K)} - w^*\|^2 \leq \|\bar{w}^{(0)} - w^*\|^2 + 2(\eta - 2\beta\eta^2) \sum_{k=1}^K (F(w^*) - F(\tilde{w}^{(t,k-1)})) + 8\beta\eta^3 K^3 \tau. \tag{50}$$

Now, we combine (49) and (50). Once  $2(\eta - 2\beta\eta^2) - \frac{6K\beta\eta^2}{nq} \geq 0$ , which implies that  $\eta \leq \frac{1}{2\beta+3K\beta/(nq)}$ ,

$$\mathbb{E}[\|\bar{w}^{(1)} - w^*\|^2] \leq \|\bar{w}^{(0)} - w^*\|^2 + \frac{12K^4\beta^2\eta^4\tau + 3K^2\eta^2\tau}{nq} + 8\beta\eta^3K^3\tau + \bar{Q}.$$

597 The remainder of the proof for the  $\|\tilde{w}^{(t,k)} - w^*\|$  is straightforward as for arbitrary  $t$ ,  $\|\tilde{w}^{(t,0)} - w^*\| =$   
598  $\|\bar{w}^{(t-1)} - w^*\|$ . Therefore, by induction reasoning, we have the bound claimed.

599 **B Proof of Theorem 3.2: Synchronized-only Convergence of Noisy LSGD in**  
600 **Non-convex Optimization**

601 Based on the smooth assumption of  $F(w)$ , we have the following classic inequality,

$$\begin{aligned}
F(\bar{w}^{(t)}) &\leq F(\bar{w}^{(t-1)}) + \langle \nabla F(\bar{w}^{(t-1)}), \bar{w}^{(t)} - \bar{w}^{(t-1)} \rangle + \frac{\beta}{2} \|\bar{w}^{(t)} - \bar{w}^{(t-1)}\|^2 \\
&= F(\bar{w}^{(t-1)}) - \langle \nabla F(\bar{w}^{(t-1)}), \frac{\eta}{nq} \sum_{i \in S^{(t)}} \sum_{k=0}^{K-1} \nabla f_i(w_i^{(t,k)}) - Q^{(t)} \rangle \\
&\quad + \frac{\beta}{2} \left\| \frac{\eta}{nq} \sum_{i \in S^{(t)}} \sum_{k=0}^{K-1} \nabla f_i(w_i^{(t,k)}) - Q^{(t)} \right\|^2 \\
&= F(\bar{w}^{(t-1)}) \\
&\quad - \frac{\eta}{2} \left( \sum_{k=0}^{K-1} (\|\nabla F(\bar{w}^{(t-1)})\|^2 + \left\| \frac{1}{nq} \sum_{i \in S^{(t)}} \nabla f_i(w_i^{(t,k)}) \right\|^2 - \left\| \nabla F(\bar{w}^{(t-1)}) - \frac{1}{nq} \sum_{i \in S^{(t)}} \nabla f_i(w_i^{(t,k)}) \right\|^2) \right) \\
&\quad + \langle \nabla F(\bar{w}^{(t-1)}), Q^{(t)} \rangle + \frac{\beta}{2} \left\| \frac{\eta}{nq} \sum_{i \in S^{(t)}} \sum_{k=0}^{K-1} \nabla f_i(w_i^{(t,k)}) - Q^{(t)} \right\|^2.
\end{aligned} \tag{51}$$

602 In (51), we simply use the fact that  $\langle a, b \rangle = \frac{\|a\|^2 + \|b\|^2 - \|a-b\|^2}{2}$ . For notation simplicity, we will  
603 use  $g_i^{(t,k)} = \nabla f_i(w_i^{(t,k)})$  and  $g^{(t,k)} = \frac{1}{nq} \cdot \sum_{i \in S_t} \nabla f_i(w_i^{(t,k)}) = \frac{1}{nq} \cdot \sum_{i \in S_t} g_i^{(t,k)}$  in the following.  
604 Using the generalized AM-GM inequality, where  $\langle a, b \rangle \leq \frac{1}{2}(\gamma \|a\|^2 + \frac{1}{\gamma} \|b\|^2)$  for any  $\gamma > 0$ , on  
605  $\langle \nabla F(w^{(t-1)}), Q^{(t)} \rangle$ , we have that

$$\langle \nabla F(w^{(t-1)}), Q^{(t)} \rangle \leq \frac{\eta}{4} \|\nabla F(w^{(t-1)})\|^2 + \frac{1}{\eta} \|Q^{(t)}\|^2. \tag{52}$$

606 Similarly,

$$\frac{\beta}{2} \left\| \frac{\eta}{nq} \sum_{i \in S_t} \sum_{k=0}^{K-1} g_i^{(t,k)} - Q^{(t)} \right\|^2 \leq \beta(\eta^2 \left\| \frac{1}{nq} \sum_{i \in S_t} \sum_{k=0}^{K-1} g_i^{(t,k)} \right\|^2 + \|Q^{(t)}\|^2). \tag{53}$$

607 Thus, putting together, we have the following by rearranging the terms in (51),

$$\begin{aligned}
\left( \frac{\eta K}{2} - \frac{\eta}{4} \right) \|\nabla F(\bar{w}^{(t-1)})\|^2 &\leq F(\bar{w}^{(t-1)}) - F(\bar{w}^{(t)}) - \underbrace{\left( \frac{\eta}{2} \sum_{k=0}^{K-1} \|g^{(t,k)}\|^2 - \beta \eta^2 \left\| \sum_{k=0}^{K-1} g^{(t,k)} \right\|^2 \right)}_{(A)} \\
&\quad + \frac{\eta}{2} \sum_{k=0}^{K-1} \|\nabla F(\bar{w}^{(t-1)}) - g^{(t,k)}\|^2 + \left( \frac{1}{\eta} + \beta \right) \|Q^{(t)}\|^2.
\end{aligned} \tag{54}$$

608 Still by AM-GM inequality, it is noted that  $\sum_{k=0}^{K-1} \|g^{(t,k)}\|^2 \leq K \sum_{k=0}^{K-1} \|g^{(t,k)}\|^2$  and therefore  
609 term (A) is lower bounded by  $(\frac{\eta}{2} - \beta \eta^2 K) \sum_{k=0}^{K-1} \|g^{(t,k)}\|^2$ . For a sufficiently small learning  
610 rate  $\eta$ , term (A) is non-negative. Thus, to upper bound  $\|\nabla F(w^{(t)})\|^2$ , it suffices to keep track of  
611  $\|\nabla F(w^{(t)}) - g^{(t,k)}\|^2$ .

612 Now, we imagine the scenario that each agent participates in the  $t$ -th phase without Poisson  
613 sampling and each produces intermediate  $w_i^{(t,k)}$  for  $i = 1, 2, \dots, n$  and  $k = 1, 2, \dots, K$ . Let  
614  $\tilde{w}^{(t,k)} = \frac{1}{n} \sum_{i=1}^n w_i^{(t,k)}$ . It is not hard to observe that conditional on  $\bar{w}^{(t-1)}$ ,  $\mathbb{E}[\tilde{w}^{(t,k)} - \bar{w}^{(t-1)}] =$

615  $-\eta \mathbb{E}[\sum_{l=0}^{k-1} g^{(t,l)}]$ . On the other hand, by AM-GM inequality again,

$$\begin{aligned}
& \|\nabla F(w^{(t-1)}) - g^{(t,k)}\|^2 \\
& \leq 2(\|\nabla F(\bar{w}^{(t-1)}) - \nabla F(\tilde{w}^{(t,k)})\|^2 + \|\nabla F(\tilde{w}^{(t,k)}) - g^{(t,k)}\|^2) \\
& \leq 2(\beta^2 \|\bar{w}^{(t-1)} - \tilde{w}^{(t,k)}\|^2 + \|\nabla F(\tilde{w}^{(t,k)}) - g^{(t,k)}\|^2) \\
& = 2(\beta^2 \|\bar{w}^{(t-1)} - \tilde{w}^{(t,k)}\|^2 + \|\frac{\sum_{i=1}^n (q - 1_i^{(t)})(\nabla f_i(\tilde{w}^{(t,k)}) - \nabla f_i(w_i^{(t,k)}))}{nq}\|^2).
\end{aligned} \tag{55}$$

616 In (55), we use the  $\beta$ -smooth assumption on  $\nabla F(w)$ , and  $1_i^{(t)}$  is an indicator which equals 1 iff the  
617  $i$ -th worker/agent is selected in the  $t$ -th phase with probability  $q$ , otherwise 0. We first handle the first  
618 term  $\beta^2 \|\bar{w}^{(t-1)} - \tilde{w}^{(t,k)}\|^2$ . With expectation conditional on  $\bar{w}^{(t-1)}$ ,

$$\begin{aligned}
\mathbb{E}[\|\bar{w}^{(t-1)} - \tilde{w}^{(t,k)}\|^2] &= \mathbb{E}[\eta^2 \|\sum_{l=0}^{k-1} g^{(t,l)}\|^2] - \mathbb{E}[\|-(\eta \sum_{l=0}^{k-1} g^{(t,l)}) - (\bar{w}^{(t-1)} - \tilde{w}^{(t,k)})\|^2] \\
&\leq k\eta^2 \sum_{l=0}^{k-1} \mathbb{E}[\|g^{(t,l)}\|^2]
\end{aligned} \tag{56}$$

619 In (56), we use the following fact about the variance and second moment: for a random vector  $v$   
620 whose mean is  $\mu$ ,  $\mathbb{E}[\|v\|^2] = \mathbb{E}[\|v - \mu\|^2] + \|\mu\|^2$ . As mentioned above, the expectation conditional  
621 on  $\bar{w}^{(t-1)}$   $\mathbb{E}[\tilde{w}^{(t,k)} - \bar{w}^{(t-1)}] = -\eta \mathbb{E}[\sum_{l=0}^{k-1} g^{(t,l)}]$ . Therefore,

$$2\beta^2 \sum_{k=1}^K \mathbb{E}[\|\bar{w}^{(t-1)} - \tilde{w}^{(t,k)}\|^2] \leq 2\beta^2 \sum_{k=1}^K k\eta^2 \sum_{l=0}^{k-1} \mathbb{E}[\|g^{(t,l)}\|^2] \leq 2\beta^2 \eta^2 K^2 \sum_{k=0}^{K-1} \mathbb{E}[\|g^{(t,k)}\|^2]. \tag{57}$$

Now, combined the same term  $\mathbb{E}[\|g^{(t,k)}\|^2]$  in (57) with (A), it is not hard to verify that, once  $\frac{\eta}{2} - \beta\eta^2 K - \beta^2\eta^3 K^2 \geq 0$ , which holds when  $\eta < \frac{1}{4\beta K}$ , then the expectation

$$\mathbb{E}[\frac{\eta}{2} \cdot 2\beta^2 K^2 \eta^2 \sum_{k=0}^{K-1} \|\sum_{l=0}^k g^{(t,l)}\|^2 - (A)] \leq 0.$$

622 Now, we move our focus to the second term  $\|\frac{1}{nq} \cdot \sum_{i=1}^n (q - 1_i^{(t)})(\nabla f_i(\tilde{w}^{(t,k)}) - \nabla f_i(w_i^{(t,k)}))\|^2$   
623 in (55).

624 Based on the assumption on Poisson sampling,  $1_i^{(t)}$  is independent and  $\mathbb{E}[1_i^{(t)}] = q$  for  $i = 1, 2, \dots, n$ .  
625 Moreover,  $\mathbb{E}[(1_i^{(t)} - q)^2] = q - q^2 < q$ . Therefore, with expectation,

$$\begin{aligned}
& \sum_{k=0}^{K-1} \mathbb{E}[\|\frac{\sum_{i=1}^n (q - 1_i^{(t)})(\nabla f_i(\tilde{w}^{(t,k)}) - \nabla f_i(w_i^{(t,k)}))}{nq}\|^2] \\
&= \sum_{k=0}^{K-1} \sum_{i=1}^n \frac{(q - q^2) \mathbb{E}[\|\nabla f_i(\tilde{w}^{(t,k)}) - \nabla f_i(w_i^{(t,k)})\|^2]}{(nq)^2} \leq \sum_{k=0}^{K-1} \sum_{i=1}^n \frac{\beta^2 \mathbb{E}[\|\tilde{w}^{(t,k)} - w_i^{(t,k)}\|^2]}{n^2 q}.
\end{aligned} \tag{58}$$

In (58), we use the fact for  $n$  random independent vectors  $v_{[1:n]}$  of zero mean,  $\mathbb{E}[\|\sum_{i=1}^n v_i\|^2] = \sum_{i=1}^n \mathbb{E}[\|v_i\|^2]$ . On the other hand, we can apply the results of Lemma A.3 to upper bound  $\sum_{i=1}^n \mathbb{E}[\|w_i^{(t,k)} - \tilde{w}^{(t,k)}\|^2]$  by  $4\eta^2 k^2 n\tau$  once  $\eta < \min\{\frac{\beta}{\sqrt{24K}}, \frac{1}{20\beta}\}$ . Now, back to (58), we have that

$$\sum_{k=0}^{K-1} \sum_{i=1}^n \frac{\beta^2 \mathbb{E}[\|\tilde{w}^{(t,k)} - w_i^{(t,k)}\|^2]}{n^2 q} \leq \frac{4\eta^2 \tau \beta^2 K^3}{nq}.$$

626 With the above preparation, we are finally ready to complete the proof. Back to (54), conditional on  
 627  $w^{(t-1)}$ , with expectation we have that

$$\begin{aligned} \left(\frac{\eta K}{2} - \frac{\eta}{4}\right) \|\nabla F(\bar{w}^{(t-1)})\|^2 &\leq \mathbb{E}[F(\bar{w}^{(t-1)}) - F(\bar{w}^{(t)})] - \left(\frac{\eta}{2} - \beta\eta^2 K - \beta^2\eta^3 K^2\right) \sum_{k=0}^{K-1} \mathbb{E}[\|g^{(t,k)}\|^2] \\ &\quad + \frac{\eta}{2} \cdot \frac{8\eta^2\tau\beta^2 K^3}{nq} + \left(\frac{1}{\eta} + \beta\right) \|Q^{(t)}\|^2. \end{aligned} \quad (59)$$

628 Summing up both sides of (59) for  $t = 1, 2, \dots, T$ , with unconditional expectation and averaging,  
 629 since  $\eta K/2 - \eta/4 \geq \eta K/4$  for  $K \geq 1$ , we obtain that once  $\eta < \min\{\frac{\beta}{\sqrt{24K}}, \frac{1}{4\beta K}, \frac{1}{20\beta}\}$ ,

$$\mathbb{E}\left[\frac{\sum_{t=1}^T \|\nabla F(\bar{w}^{(t-1)})\|^2}{T}\right] \leq \frac{4F(\bar{w}^{(0)})}{TK\eta} + \frac{16\eta^2\tau\beta^2 K^2}{nq} + \frac{(1 + \beta\eta) \sum_{t=1}^T \mathbb{E}[\|Q^{(t)}\|^2]}{\eta^2 KT}.$$

630 Alternatively, especially when the perturbation  $Q^{(t)}$  is independent and of zero-mean, we may  
 631 consider another bound derived as follows. Still, based on the smooth assumption of  $F(w)$ , if we  
 632 focus on each cross term between  $\nabla F(\bar{w}^{(t-1)})$  and  $\nabla f_i(w_i^{(t,k)})$ , we have

$$\begin{aligned} F(\bar{w}^{(t)}) &\leq F(\bar{w}^{(t-1)}) + \langle \nabla F(\bar{w}^{(t-1)}), \bar{w}^{(t)} - \bar{w}^{(t-1)} \rangle + \frac{\beta}{2} \|\bar{w}^{(t)} - \bar{w}^{(t-1)}\|^2 \\ &= F(\bar{w}^{(t-1)}) - \langle \nabla F(\bar{w}^{(t-1)}), \frac{\eta}{nq} \sum_{i \in S^{(t)}} \sum_{k=0}^{K-1} \nabla f_i(w_i^{(t,k)}) - Q^{(t)} \rangle \\ &\quad + \frac{\beta}{2} \left\| \frac{\eta}{nq} \sum_{i \in S^{(t)}} \sum_{k=0}^{K-1} \nabla f_i(w_i^{(t,k)}) - Q^{(t)} \right\|^2 \\ &= F(\bar{w}^{(t-1)}) \\ &\quad - \frac{\eta}{2nq} \cdot \left( \sum_{i \in S^{(t)}} \sum_{k=0}^{K-1} (\|\nabla F(\bar{w}^{(t-1)})\|^2 + \|\nabla f_i(w_i^{(t,k)})\|^2 - \|\nabla F(\bar{w}^{(t-1)}) - \nabla f_i(w_i^{(t,k)})\|^2) \right) \\ &\quad + \langle \nabla F(\bar{w}^{(t-1)}), Q^{(t)} \rangle + \frac{\beta}{2} \left\| \frac{\eta}{nq} \sum_{i \in S^{(t)}} \sum_{k=0}^{K-1} \nabla f_i(w_i^{(t,k)}) - Q^{(t)} \right\|^2. \end{aligned} \quad (60)$$

633 With a similar reasoning as (53), we have the following by rearranging the terms in (60),

$$\begin{aligned} \frac{\eta K B_t}{2nq} \|\nabla F(\bar{w}^{(t-1)})\|^2 &\leq F(\bar{w}^{(t-1)}) - F(\bar{w}^{(t)}) - \underbrace{\left(\frac{\eta}{2nq} - \frac{\beta\eta^2 B_t K}{(nq)^2}\right) \sum_{i \in S^{(t)}} \sum_{k=0}^{K-1} \|g_i^{(t,k)}\|^2}_{(A)} \\ &\quad + \frac{\eta}{2nq} \sum_{i \in S^{(t)}} \sum_{k=0}^{K-1} \|\nabla F(\bar{w}^{(t-1)}) - g_i^{(t,k)}\|^2 + \beta \|Q^{(t)}\|^2. \end{aligned} \quad (61)$$

634 For a sufficiently small learning rate  $\eta$ , term (A) is non-negative. Thus, to upper bound  $\|\nabla F(w^{(t)})\|^2$ ,  
 635 it suffices to keep track of  $\|\nabla F(\bar{w}^{(t-1)}) - g^{(t,k)}\|^2$ . Conditional on  $\bar{w}^{(t-1)}$ , take expectation on both  
 636 sides of (54) and we have

$$\begin{aligned} \frac{\eta K}{2} \mathbb{E}[\|\nabla F(\bar{w}^{(t-1)})\|^2] &\leq \mathbb{E}[F(\bar{w}^{(t-1)}) - F(\bar{w}^{(t)}) - \left(\frac{\eta}{2n} - \frac{\beta\eta^2 K}{n}\right) \sum_{i=1}^n \sum_{k=0}^{K-1} \|g_i^{(t,k)}\|^2 \\ &\quad + \frac{\eta}{2n} \sum_{i=1}^n \sum_{k=0}^{K-1} \|\nabla F(\bar{w}^{(t-1)}) - g_i^{(t,k)}\|^2 + \beta \|Q^{(t)}\|^2], \end{aligned} \quad (62)$$

637 since  $\mathbb{E}[B_t] = nq$ .

638 By AM-GM inequality again,

$$\begin{aligned}
& \sum_{i=1}^n \|\nabla F(\bar{w}^{(t-1)}) - g_i^{(t,k)}\|^2 \\
& \leq 2 \sum_{i=1}^n (\|\nabla F(\bar{w}^{(t-1)}) - \nabla f_i(\bar{w}^{(t-1)})\|^2 + \|\nabla f_i(\bar{w}^{(t-1)}) - \nabla f_i(w_i^{(t,k)})\|^2) \\
& \leq 2(n\tau + \beta^2 \sum_{i=1}^n \|\bar{w}^{(t-1)} - w_i^{(t,k)}\|^2) \\
& = 2(n\tau + \beta^2 \eta^2 \sum_{i=1}^n \|\sum_{l=0}^{k-1} g_i^{(t,l)}\|^2) \leq 2(n\tau + \beta^2 \eta^2 k \sum_{i=1}^n \sum_{l=0}^{k-1} \|g_i^{(t,l)}\|^2).
\end{aligned} \tag{63}$$

Plugging (63), which suggests that

$$\frac{\eta}{2n} \sum_{i=1}^n \sum_{k=0}^{K-1} \|\nabla F(\bar{w}^{(t-1)}) - g_i^{(t,k)}\|^2 \leq \eta(\tau K + \frac{\beta^2 \eta^2 K^2}{n} \sum_{i=1}^n \sum_{k=0}^{K-1} \|g_i^{(t,k)}\|^2),$$

639 back to (62), we have that

$$\begin{aligned}
\frac{\eta K}{2} \mathbb{E}[\|\nabla F(\bar{w}^{(t-1)})\|^2] & \leq \mathbb{E}[F(\bar{w}^{(t-1)}) - F(\bar{w}^{(t)}) - (\frac{\eta}{2n} - \frac{\beta \eta^2 K}{n} - \frac{\beta^2 \eta^3 K^2}{n}) \sum_{i=1}^n \sum_{k=0}^{K-1} \|g_i^{(t,k)}\|^2 \\
& \quad + \eta \tau K + \beta \|Q^{(t)}\|^2],
\end{aligned} \tag{64}$$

640 Therefore, when  $\frac{\eta}{2n} - \frac{\beta \eta^2 K}{n} - \frac{\beta^2 \eta^3 K^2}{n} \geq 0$ , which requires that  $\eta \leq \frac{1}{2\beta K}$ , we have

$$\mathbb{E}[\|\nabla F(\bar{w}^{(t-1)})\|^2] \leq 2 \cdot \mathbb{E}[\frac{F(\bar{w}^{(t-1)}) - F(\bar{w}^{(t)})}{\eta K} + \tau + \frac{\beta}{\eta K} \|Q^{(t)}\|^2]. \tag{65}$$

641 Now, we sum up (65) both sides for  $t = 1, 2, \dots, T$  and average them, we have that

$$\mathbb{E}[\frac{\sum_{t=1}^T \|\nabla F(\bar{w}^{(t-1)})\|^2}{T}] \leq 2 \cdot \mathbb{E}[\frac{F(\bar{w}^{(t-1)})}{\eta T K} + \tau + \frac{\sum_{t=1}^T \beta \mathbb{E}[\|Q^{(t)}\|^2]}{\eta T K}]. \tag{66}$$



## C Proof of Theorem 4.1: Utility of DP-LSGD in General Convex Optimization

We first focus on the clipped local update  $\mathcal{CP}(\Delta w_i^{(t)}, c) = \mathcal{CP}(w_i^{(t,K)} - \bar{w}^{(t-1)}, c)$  in the  $t$ -th phase if the  $i$ -th sample gets selected. Since the local update before clipping is essentially the sum of gradient scaled by the learning rate  $-\eta$ , therefore,

$$\mathcal{CP}(w_i^{(t,K)} - \bar{w}^{(t-1)}, c) = \mathcal{CP}(-\eta \sum_{k=0}^{K-1} \nabla f_i(w_i^{(t,k)}), c) = -\eta_i^{(t)} \sum_{k=0}^{K-1} \nabla f_i(w_i^{(t,k)}), \quad (67)$$

where  $\eta_i^{(t)} = \eta \cdot \min\{1, \frac{c}{\|\sum_{k=0}^{K-1} \nabla f_i(w_i^{(t,k)})\|}\}$  is determined by the clipping threshold, and thus

$$\eta_i^{(t)} \leq \eta. \text{ Based on Definition 4.1,}$$

$$\eta - \eta_i^{(t)} = \eta \cdot (1 - \frac{c}{c + \mathbf{1}(\|\Delta w_i^{(t)}\| > c) \cdot (\|\Delta w_i^{(t)}\| - c)}) = \eta \cdot \frac{\Psi_i^{(t)}}{c + \Psi_i^{(t)}}, \quad (68)$$

where  $\Psi_i^{(t)} = \max\{0, \|\Delta w_i^{(t)}\| - c\}$  represents the incremental norm of the local update from the  $i$ -th sample in the  $t$ -th phase. For simplicity, we will use  $\Delta \Psi_i^{(t)}$  to denote  $\frac{\Psi_i^{(t)}}{c + \Psi_i^{(t)}}$ .

Now, we consider two virtual sequences:

- a)  $w_i'^{(t,0)} = \bar{w}^{(t-1)}$  and  $w_i'^{(t,k)} = w_i'^{(t,k-1)} - \eta_i^{(t)} \nabla f_i(w_i^{(t,k-1)})$ , which represents a sequence of iterates based on the gradients  $\nabla f_i(w_i^{(t,k-1)})$  but scaled by  $\eta_i^{(t)}$  instead of constant  $\eta$  for each  $i$ ;
- b) We use  $\hat{w}^{(t,k)} = \frac{1}{nq} \cdot \sum_{i=1}^n \mathbf{1}_i^{(t)} \cdot w_i'^{(t,k)}$  to represent the average of  $w_i'^{(t,k)}$  for those indices  $i$  selected in the  $t$ -th phase. Here,  $\mathbf{1}_i^{(t)} = 1$  iff the  $i$ -th sample is selected in the  $t$ -th phase. Similarly, we define  $\tilde{w}^{(t,k)} = \frac{1}{n} \cdot w_i'^{(t,k)}$  to be the average of all  $w_i'^{(t,k)}$  for  $i = 1, 2, \dots, n$ . It is not hard to observe that  $\tilde{w}^{(t,K)} = \bar{w}^{(t-1)} + \mathcal{CP}(\Delta w_i^{(t)}, c)$ , and consequently conditional on  $\bar{w}^{(t-1)}$ ,  $\mathbb{E}[\tilde{w}^{(t)}] = \mathbb{E}[\hat{w}^{(t,K)}] = \tilde{w}^{(t,K)}$  since the independent DP noise satisfies that  $\mathbb{E}[Q^{(t)}] = 0$ .

In the following, we unravel  $\|\tilde{w}^{(t,k)} - u\|^2$  for arbitrary  $u$  and obtain

$$\begin{aligned} & \|\hat{w}^{(t,k)} - u\|^2 \\ &= \|\hat{w}^{(t,k-1)} - \sum_{i=1}^n \frac{\eta_i^{(t)} \cdot \mathbf{1}_i^{(t)} \cdot \nabla f_i(w_i^{(t,k-1)})}{nq} - u\|^2 \\ &= \|\hat{w}^{(t,k-1)} - u\|^2 - \frac{2}{nq} \cdot \sum_{i=1}^n \eta_i^{(t)} \mathbf{1}_i^{(t)} \langle \hat{w}^{(t,k-1)} - u, \nabla f_i(w_i^{(t,k-1)}) \rangle + \|\frac{\sum_{i=1}^n \eta_i^{(t)} \mathbf{1}_i^{(t)} \nabla f_i(w_i^{(t,k-1)})}{nq}\|^2. \end{aligned} \quad (69)$$

We first work on the last term of (69). With the fact that  $\eta_i^{(t)} \leq \eta$ , conditional on  $\bar{w}^{(t-1)}$ ,

$$\begin{aligned} & \mathbb{E}[\|\frac{\sum_{i=1}^n \eta_i^{(t)} \mathbf{1}_i^{(t)} \nabla f_i(w_i^{(t,k-1)})}{nq}\|^2] \\ &= \mathbb{E}[\|\frac{\sum_{i=1}^n \eta_i^{(t)} \mathbf{1}_i^{(t)} \nabla f_i(w_i^{(t,k-1)})}{nq} - \frac{\sum_{i=1}^n \eta_i^{(t)} \nabla f_i(w_i^{(t,k-1)})}{n} + \frac{\sum_{i=1}^n \eta_i^{(t)} \nabla f_i(w_i^{(t,k-1)})}{n}\|^2] \\ &\leq 2 \cdot \mathbb{E}[\|\frac{\sum_{i=1}^n \eta_i^{(t)} (\mathbf{1}_i^{(t)} - q) \nabla f_i(w_i^{(t,k-1)})}{nq}\|^2] + 2 \cdot \|\frac{\sum_{i=1}^n \eta_i^{(t)} \nabla f_i(w_i^{(t,k-1)})}{n}\|^2 \\ &\leq \frac{2(q - q^2) \sum_{i=1}^n \|\eta_i^{(t)} \nabla f_i(w_i^{(t,k-1)})\|^2}{(nq)^2} + \frac{2 \sum_{i=1}^n \|\eta_i^{(t)} \nabla f_i(w_i^{(t,k-1)})\|^2}{n} \\ &\leq \frac{4\eta^2 \sum_{i=1}^n \|\nabla f_i(w_i^{(t,k-1)})\|^2}{n} \end{aligned} \quad (70)$$

663 which can be further bounded via Lemma A.1 as

$$4\eta^2 \left( \frac{3\beta^2 \sum_{i=1}^n \|w_i^{(t,k-1)} - \tilde{w}^{(t,k-1)}\|^2}{n} + \min\{6\beta F(\tilde{w}^{(t,k-1)}) - F(w^*), 3\beta^2 \|\tilde{w}^{(t,k-1)} - w^*\|^2\} + 3\tau \right). \quad (71)$$

664 Now, we move our focus to the second term of (69). Still, with a similar reasoning as Lemma A.2,

$$\begin{aligned} & \mathbb{E} \left[ \frac{-2}{nq} \cdot \sum_{i=1}^n \mathbf{1}_i^{(t)} \eta_i^{(t)} \langle \tilde{w}^{(t,k-1)} - u, \nabla f_i(w_i^{(t,k-1)}) \rangle \right] \\ &= \left[ \frac{-2}{n} \cdot \sum_{i=1}^n \eta(1 - \Delta\Psi_i^{(t)}) \langle \tilde{w}^{(t,k-1)} - u, \nabla f_i(w_i^{(t,k-1)}) \rangle \right] \\ &\leq \frac{2}{n} \sum_{i=1}^n \eta(1 - \Delta\Psi_i^{(t)}) (f_i(u) - f_i(\tilde{w}^{(t,k-1)})) + \frac{\beta}{2} \|w_i^{(t,k-1)} - \tilde{w}^{(t,k-1)}\|^2 \\ &\leq 2\eta(F(u) - F(\tilde{w}^{(t,k-1)})) + \frac{\beta}{2n} \cdot \sum_{i=1}^n (1 - \Delta\Psi_i^{(t)}) \|w_i^{(t,k-1)} - \tilde{w}^{(t,k-1)}\|^2 \\ &\quad - \frac{2}{n} \cdot \sum_{i=1}^n \eta \Delta\Psi_i^{(t)} (F(u) - F(\tilde{w}^{(t,k-1)})) + \sum_{i=1}^n \frac{2}{n} (\eta \Delta\Psi_i^{(t)}) \cdot 2\gamma \\ &\leq 2\eta \left(1 - \frac{\sum_{i=1}^n \Delta\Psi_i^{(t)}}{n}\right) (F(u) - F(\tilde{w}^{(t,k-1)})) + \left(\frac{\beta\eta}{n} \sum_{i=1}^n \|w_i^{(t,k-1)} - \tilde{w}^{(t,k-1)}\|^2\right) + \frac{4\eta\gamma \sum_{i=1}^n \Delta\Psi_i^{(t)}}{n}. \end{aligned} \quad (72)$$

665 In the fourth line of (72), we use the  $\gamma$ -similarity assumption from Assumption 4.2. In the following,

666 we will use  $\Delta\bar{\Psi}^{(t)} = \frac{\sum_{i=1}^n \Delta\Psi_i^{(t)}}{n}$  for simplicity.

667 Next, we work on the upper bound of  $\sum_{i=1}^n \|w_i^{(t,k-1)} - \tilde{w}^{(t,k-1)}\|^2$ . Similar to Lemma A.3,

$$\begin{aligned} & \sum_{i=1}^n \|\tilde{w}^{(t,k-1)} - w_i^{(t,k-1)}\|^2 \\ &= \sum_{i=1}^n \left\| \frac{\sum_{l=0}^{k-1} \sum_{j=1}^n \eta_j^{(t)} \nabla f_j(w_j^{(t,l)})}{n} - \eta \cdot \sum_{l=0}^{k-1} \nabla f_i(w_i^{(t,l)}) \right\|^2 \\ &\leq 2 \sum_{i=1}^n \left( \eta^2 \left\| \frac{\sum_{l=0}^{k-1} \sum_{j=1}^n (\nabla f_j(w_j^{(t,l)}) - \nabla f_i(w_i^{(t,l)}))}{n} \right\|^2 + \left\| \frac{\sum_{l=0}^{k-1} \sum_{j=1}^n (\eta - \eta_j^{(t)}) \nabla f_j(w_j^{(t,l)})}{n} \right\|^2 \right) \end{aligned} \quad (73)$$

668 For the first term in (73), we have studied it in Lemma A.3, where once  $\eta^2 < \frac{\beta^2}{24K^2}$ ,

$$\sum_{i=1}^n \left\| \eta \cdot \frac{\sum_{l=0}^{k-1} \sum_{j=1}^n \nabla f_j(w_j^{(t,l)})}{n} - \eta \cdot \sum_{l=0}^{k-1} \nabla f_i(w_i^{(t,l)}) \right\|^2 \leq 4\eta^2 k^2 n\tau. \quad (74)$$

669 Plugging (74) back to (73), since  $(\eta - \eta_j^{(t)})^2 \leq \eta^2$ , and we apply the similar decomposition trick  
670 used in (71), we have that

$$\begin{aligned} & \sum_{i=1}^n \frac{\|\tilde{w}^{(t,k-1)} - w_i^{(t,k-1)}\|^2}{n} \leq 8\eta^2 k^2 n\tau + \frac{1}{n} \cdot \frac{2k\eta^2 \sum_{l=0}^{k-1} \sum_{i=1}^n \|\nabla f_i(w_i^{(t,l)})\|^2}{n} \\ &\leq 8\eta^2 k^2 \tau \\ &\quad + \frac{6k\eta^2}{n} \sum_{l=0}^{k-1} (\beta^2 \|\tilde{w}^{(t,l)} - w_i^{(t,l)}\|^2 + \min\{2\beta(F(\tilde{w}^{(t,l)}) - F(w^*)), \beta^2 \|\tilde{w}^{(t,l)} - w^*\|^2\} + \tau) \\ &\leq 14\eta^2 k^2 \tau + \frac{6k\eta^2}{n} \sum_{l=0}^{k-1} (\beta^2 \|\tilde{w}^{(t,l)} - w_i^{(t,l)}\|^2 + \min\{2\beta(F(\tilde{w}^{(t,l)}) - F(w^*)), \beta^2 \|\tilde{w}^{(t,l)} - w^*\|^2\}), \end{aligned} \quad (75)$$

671 given that  $n \geq 1$ . Thus, when  $\eta$  is selected small enough such that  $\eta \leq \min\{\frac{\sqrt{n}}{\sqrt{30}K\beta}, \frac{1}{\sqrt{6}K}\}$ , for any  
 672  $k_0 \leq K$ , by induction it is not hard to verify that

$$\begin{aligned} & \frac{\sum_{i=1}^n \|w_i^{(t, k_0-1)} - \tilde{w}^{(t, k_0-1)}\|^2}{n} \\ & \leq 15\eta^2 k_0^2 \tau + \frac{12\eta^2 k_0}{n} \left( \sum_{l=0}^{k_0-1} \min \{2\beta(F(\tilde{w}^{(t, l)}) - F(w^*)), \beta^2 \|\tilde{w}^{(t, l)} - w^*\|^2\} \right). \end{aligned} \quad (76)$$

673 Now, we put (71), (72) and (76) together, and go back to (69)

$$\begin{aligned} & [\eta(1 - \Delta\bar{\Psi}^{(t)})(F(\tilde{w}^{(t, k-1)}) - F(u))] \leq \mathbb{E}[\|\hat{w}^{(t, k-1)} - u\|^2 - \|\hat{w}^{(t, k)} - u\|^2] + 4\eta\gamma\Delta\bar{\Psi}^{(t)} \\ & + (12\eta^2\beta^2 + \beta\eta)(15\eta^2 k^2 \tau + \frac{12\eta^2 k}{n} \left( \sum_{l=0}^{k-1} \min \{2\beta(F(\tilde{w}^{(t, l)}) - F(w^*)), \beta^2 \|\tilde{w}^{(t, l)} - w^*\|^2\} \right)) \\ & + 12\eta^2 \min \{2\beta(F(\tilde{w}^{(t, k-1)}) - F(w^*)), \beta^2 \|\tilde{w}^{(t, l)} - w^*\|^2\} + 12\eta^2 \tau \end{aligned} \quad (77)$$

674 When  $\eta$  is small enough such that  $12\eta^2\beta^2 + \beta\eta \leq 2\beta\eta$ , (77) can be simplified as

$$\begin{aligned} & [\eta(1 - \Delta\bar{\Psi}^{(t)})(F(\tilde{w}^{(t, k-1)}) - F(u))] \leq \mathbb{E}[\|\hat{w}^{(t, k-1)} - u\|^2 - \|\hat{w}^{(t, k)} - u\|^2] + 4\eta\gamma\Delta\bar{\Psi}^{(t)} \\ & + (10K^2\beta\eta^3 + 12\eta^2)\tau + \frac{24K\beta\eta^3}{n} \sum_{l=0}^{k-1} \min \{2\beta(F(\tilde{w}^{(t, l)}) - F(w^*)), \beta^2 \|\tilde{w}^{(t, l)} - w^*\|^2\} \\ & + 12\eta^2 \min \{2\beta(F(\tilde{w}^{(t, k-1)}) - F(w^*)), \beta^2 \|\tilde{w}^{(t, l)} - w^*\|^2\}. \end{aligned} \quad (78)$$

675 The remainder of the proof is almost the same as that for Theorem 4.1. On one hand, it is noted that

$$1 - \Delta\bar{\Psi}^{(t)} = \sum_{i=1}^n \frac{1}{n} \cdot \frac{c}{c + \Psi_i^{(t)}} \geq \frac{c}{c + \frac{\Psi^{(t)}}{n}}, \quad (79)$$

676 since  $1/(1+x)$  is convex regarding  $x$ . Therefore,  $\mathbb{E}[(1 - \Delta\bar{\Psi}^{(t)})] \geq \frac{c}{c+B}$  and  $\mathbb{E}[\Delta\bar{\Psi}^{(t)}] \leq \frac{B}{c+B}$  by

677 Assumption 4.1 that  $\mathbb{E}[\frac{\sum_{i=1}^n \Psi_i^{(t)}}{n}] \leq B$ .

678 Therefore, for sufficiently small  $\eta = O(n/K^2)$  such that  $24\eta^2\beta + \frac{48K^2\beta^2\eta^3}{n} \leq \frac{c\eta}{2(c+B)}$ , summing  
 679 up both sides of (77) for  $k = 1, 2, \dots, K$  and  $t = 1, 2, \dots, T$  with  $u = w^*$ , and take the zero-mean  
 680 independent DP noise into account where  $\bar{w}^{(t)} = \hat{w}^{(t, K)} + Q^{(t)}$ , we have

$$\begin{aligned} & \mathbb{E}\left[\frac{\sum_{t=1}^T \sum_{k=1}^{K-1} \frac{c}{2(c+B)} (F(\tilde{w}^{(t, k-1)}) - F(w^*))}{TK}\right] \\ & \leq \frac{\|\bar{w}^{(0)} - w^*\|^2}{TK\eta} + (30K^2\beta\eta^2 + 12\eta)\tau + \frac{4\gamma B}{c+B} + \frac{\sigma^2 d}{K\eta}. \end{aligned} \quad (80)$$

681 To obtain the convergence guarantee of  $\bar{w}^{(T)}$ , we similarly imagine a virtual step where we implement  
 682 one additional full gradient descent using the entire set and we have that

$$\begin{aligned} & \|\tilde{w}^{(T+1, 1)} - u\|^2 = \|\bar{w}^{(T)} - u - \eta \cdot \frac{\sum_{i=1}^n \nabla f_i(\tilde{w}^{(T, K)})}{n}\|^2 \\ & \leq \|\bar{w}^{(T)} - u\|^2 - 2\eta(F(\bar{w}^{(T)}) - F(u)) + \eta^2 \|\nabla F(\bar{w}^{(T)}) - \nabla F(w^*)\|^2 \\ & \leq \|\bar{w}^{(T)} - w^*\|^2 - 2\eta(F(\bar{w}^{(T)}) - F(u)) + \eta^2 \min\{\beta^2 \|\bar{w}^{(T)} - w^*\|^2, 2\beta(F(\bar{w}^{(T)}) - F(w^*))\}. \end{aligned} \quad (81)$$

683 Therefore, for small enough  $\eta$ , such that  $\eta - \eta^2\beta > 0.5\eta$ , we combine (80) and (81) with  $u = w^*$ ,  
 684 and have

$$\begin{aligned} & \mathbb{E}\left[\frac{\sum_{t=1}^T \sum_{k=1}^K \frac{c}{2(c+B)} (F(\tilde{w}^{(t, k-1)}) - F(w^*)) + \frac{B}{2(c+B)} (F(\bar{w}^{(T)}) - F(w^*))}{TK+1}\right] \\ & \leq \frac{\|\bar{w}^{(0)} - w^*\|^2}{(TK+1)\eta} + (30K^2\beta\eta^2 + 12\eta)\tau + \frac{4\gamma B}{c+B} + \frac{\sigma^2 d}{K\eta}. \end{aligned} \quad (82)$$

685 Similarly, it is noted that conditional on  $\bar{w}^{(t-1)}$ , we still have that

$$\mathbb{E}[\|\hat{w}^{(t,k)} - u\|^2] = \mathbb{E}[\|\hat{w}^{(t,k)} - \tilde{w}^{(t,k)}\|^2] + \|\tilde{w}^{(t,k)} - u\|^2, \quad (83)$$

686 and for  $\mathbb{E}[\|\hat{w}^{(t,k)} - \tilde{w}^{(t,k)}\|^2]$  for any  $t$  and  $k$ , we use  $\tilde{w}'^{(t,k)} = \frac{1}{n} \cdot \sum_{i=1}^n w_i^{(t,k)}$ ,

$$\begin{aligned} \mathbb{E}[\|\hat{w}^{(t,k)} - \tilde{w}^{(t,k)}\|^2] &= \mathbb{E}[\|(\hat{w}^{(t,k)} - \bar{w}^{(t-1)}) - (\tilde{w}^{(t,k)} - \bar{w}^{(t-1)})\|^2] \\ &= \mathbb{E}[\|\sum_{i=1}^n \frac{\eta_i^{(t)}}{\eta} \cdot \frac{\mathbf{1}_i^{(t)} - q}{nq} \cdot \sum_{l=0}^{k-1} \nabla f_i(w_i^{(t,l)})\|^2] \leq \frac{k}{n^2 q} \sum_{i=1}^n \sum_{l=0}^{k-1} \|\nabla f_i(w_i^{(t,l)})\|^2, \end{aligned} \quad (84)$$

687 since  $\eta_i^{(t)} \leq \eta$ . Therefore, by (24), we also have that

$$\mathbb{E}[\|\hat{w}^{(t,k)} - \tilde{w}^{(t,k)}\|^2] \leq \frac{3K\eta^2}{nq} (4\beta^2 K^3 \tau \eta^2 + K\tau + \sum_{l=0}^{k-1} \beta^2 \|\tilde{w}^{(t,l)} - w^*\|^2) \quad (85)$$

688 Now, using (71) and (83), (78) can be rewritten as

$$\begin{aligned} &[\eta(1 - \Delta \bar{\Psi}^{(t)})(F(\tilde{w}^{(t,k-1)}) - F(u))] \\ &\leq \mathbb{E}[\|\tilde{w}^{(t,k-1)} - u\|^2 - \|\tilde{w}^{(t,k)} - u\|^2 + \|\tilde{w}^{(t,k-1)} - \hat{w}^{(t,k-1)}\|^2 - \|\tilde{w}^{(t,k)} - \hat{w}^{(t,k)}\|] \\ &+ \frac{\eta^2 K}{nq} \sum_{l=1}^k \left( \frac{3\beta^2 \sum_{i=1}^n \|w_i^{(t,l-1)} - \tilde{w}^{(t,k-1)}\|^2}{n} + \min\{6\beta F(\tilde{w}^{(t,k-1)}) - F(w^*), 3\beta^2 \|\tilde{w}^{(t,k-1)} - w^*\|^2\} + 3\tau \right) \\ &+ (10K^2 \beta \eta^3 + 12\eta^2) \tau + \frac{24K\beta \eta^3}{n} \sum_{l=0}^{k-1} \min\{2\beta(F(\tilde{w}^{(t,l)}) - F(w^*)), \beta^2 \|\tilde{w}^{(t,l)} - w^*\|^2\} \\ &+ 12\eta^2 \min\{2\beta(F(\tilde{w}^{(t,k-1)}) - F(w^*)), \beta^2 \|\tilde{w}^{(t,l)} - w^*\|^2\}. \end{aligned} \quad (86)$$

689 On the other hand, if we select  $u = \tilde{w}^{(t_0, k_0)}$  for some  $t_0 \in [1 : T]$  and  $k_0 \in [0, K - 1]$  in (86), when  
690  $K^2 = O(nq)$ ,

$$\begin{aligned} &\mathbb{E}\left[\frac{\sum_{(t,k) \in \mathcal{C}} \frac{c}{2(c+\mathcal{B})} (F(\tilde{w}^{(t,k)}) - F(\tilde{w}^{(t_0, k_0)})) + \frac{c}{2(c+\mathcal{B})} (F(\bar{w}^T) - F(\tilde{w}^{(t_0, k_0)}))}{(T - t_0 + 1)K - k_0 + 1}\right] \\ &\leq O(1) \cdot \left\{ \frac{\frac{3K\eta}{nq} (4\beta^2 K^3 \tau \eta^2 + K\tau + \sum_{l=0}^{k-1} \beta^2 \|\tilde{w}^{(t,l)} - w^*\|^2)}{(T - t_0 + 1)K - k_0 + 1} \right. \\ &\quad \left. \frac{K\beta^3 \eta^2}{n} \left( \frac{\sum_{(t,k) \in \mathcal{C}} \sum_{l=0}^{K-1} \mathbb{E}[\|\tilde{w}^{(t,l)} - w^*\|^2]}{(T - t_0 + 1)K - k_0 + 1} \right) + (K^2 \beta \eta^2 + \eta) \tau \right. \\ &\quad \left. + \frac{\gamma \mathcal{B}}{(c + \mathcal{B})} + \frac{\sigma^2 d}{\eta} + \eta \beta^2 \frac{\sum_{(t,k) \in \mathcal{C}} \mathbb{E}[\|\tilde{w}^{(t,k-1)} - w^*\|^2] + \mathbb{E}[\|\bar{w}^{(T)} - w^*\|^2]}{(T - t_0 + 1)K - k_0 + 1} \right\}, \end{aligned} \quad (87)$$

691 where  $\mathcal{C} = ((t_0, k), k = k_0, \dots, K - 1) \cup ((t, k), t = t_0 + 1, \dots, T, k = 0, \dots, K - 1)$ . In the  
692 following, we may apply a similar reasoning as Lemma A.4 to derive the following results.

**Lemma C.1.** *Provided sufficiently small  $\eta = o(1/K)$ , for any  $t \in [1 : T]$  and  $k \in [0 : K - 1]$*

$$\mathbb{E}[\|\tilde{w}^{(t,k)} - w^*\|^2] = O(\|\bar{w}^{(0)} - w^*\|^2 + TK(\eta\gamma \frac{\mathcal{B}}{c + \mathcal{B}} + \eta^3 K^2 \tau + \eta^2 \tau + \frac{K\tau \eta^2}{nq}) + T\sigma^2 d).$$

693

694 By Lemma (C.1),

$$\begin{aligned} &\frac{24K\beta^3 \eta^2}{n} \cdot \frac{\sum_{(t,k) \in \mathcal{C}} \sum_{l=0}^{K-1} \mathbb{E}[\|\tilde{w}^{(t,l)} - w^*\|^2] + \mathbb{E}[\|\bar{w}^{(T)} - w^*\|^2]}{(T - t_0 + 1)K - k_0} \\ &\leq \frac{K^2 \beta^3 \eta^2}{n} \cdot O(\|\bar{w}^{(0)} - w^*\|^2 + TK(\eta\gamma \frac{\mathcal{B}}{c + \mathcal{B}} + \eta^3 K^2 \tau + \eta^2 \tau + \frac{K\tau \eta^2}{nq}) + T\sigma^2 d). \end{aligned} \quad (88)$$

695 On the other hand, we have

$$\begin{aligned}
& 12\eta\beta^2 \frac{\sum_{t=t_0}^T \sum_{k=k_0+1}^{K-1} \mathbb{E}[\|\tilde{w}^{(t,k-1)} - w^*\|^2]}{(T-t_0+1)K-k_0} \\
& \leq \eta \cdot O(\|\bar{w}^{(0)} - w^*\|^2 + TK(\eta\gamma \frac{\mathcal{B}}{c+\mathcal{B}} + \eta^3 K^2 \tau + \eta^2 \tau + \frac{K\tau\eta^2}{nq}) + T\sigma^2 d).
\end{aligned} \tag{89}$$

696 Now, we can apply the last iterate trick in Lemma A.5. Let  $y_j = \frac{c}{2(c+\mathcal{B})} \mathbb{E}[(F(\tilde{w}^{(t,k)}) - F(w^*))]$  for  
697  $j = (t-1)K+k+1$  for  $t = 1, 2, \dots, T$  and  $k = 0, 1, \dots, K-1$ , and  $y_{TK+1} = \frac{c}{2(c+\mathcal{B})} \mathbb{E}[F(\bar{w}^{(T)}) -$   
698  $F(w^*)]$ .

$$\begin{aligned}
y_{TK+1} &= \mathbb{E}[\frac{c}{2(c+\mathcal{B})} (F(\bar{w}^{(T)}) - F(w^*))] \\
&= \frac{\sum_{j=1}^{TK+1} y_j}{TK+1} + \sum_{j=1}^{TK} \frac{1}{j+1} \cdot \frac{\sum_{l=TK+1-j}^{TK+1} (y_l - y_{TK+1-j})}{j} \\
&\leq \tilde{O}((\eta + \frac{\eta^2 K^2}{n} + \frac{K^2 \eta}{nq} + \frac{1}{TK\eta}) \cdot \|\bar{w}^{(0)} - w^*\|^2 \\
&\quad + TK(\frac{K^2 \eta^2}{n} + \frac{K^2 \eta}{nq} + \eta) \cdot ((1 + K^2 \eta + \frac{K}{nq})\eta^2 \tau + \eta \frac{\gamma \mathcal{B}}{c+\mathcal{B}}) + \frac{K\eta}{nq} (\beta^2 K^3 \tau \eta^2 + K\tau) \\
&\quad + (\frac{K^2 \eta}{nq} + \frac{TK^2 \eta^2}{n} + T\eta + 1/\eta)\sigma^2 d) \\
&= \tilde{O}((\frac{1}{\sqrt{TK}} + \frac{K}{nT})\|\bar{w}^{(0)} - w^*\|^2 + (\frac{K}{nT} + \frac{1}{\sqrt{TK}})(1 + \frac{K^{3/2}}{\sqrt{T}} + \frac{K}{nq})\tau + (K^2 \eta^3 + \eta)\tau \\
&\quad + (\frac{K^{3/2}}{\sqrt{Tn}} + 1)\frac{\gamma \mathcal{B}}{c+\mathcal{B}} + \sqrt{TK}\sigma^2 d) \\
&= \tilde{O}(\frac{\|\bar{w}^{(0)} - w^*\|^2}{\sqrt{TK}} + (\frac{1}{\sqrt{TK}} + \frac{K}{T})\tau + \frac{\gamma \mathcal{B}}{c+\mathcal{B}} + \sqrt{TK}\sigma^2 d).
\end{aligned} \tag{90}$$

699 when we select  $\eta = O(1/\sqrt{TK})$ ,  $K = O(nq)$  and  $K = O(T)$ . This completes the proof.

## 700 C.1 Proof of Lemma C.1

701 From (69), by letting  $u = w^*$ , given  $\bar{w}^{(t-1)}$ , we have that

$$\begin{aligned}
& \|\tilde{w}^{(t,k)} - u\|^2 \\
&= \|\tilde{w}^{(t,k-1)} - \sum_{i=1}^n \frac{\eta_i^{(t)} \cdot \nabla f_i(w_i^{(t,k-1)})}{n} - w^*\|^2 \\
&= \|\tilde{w}^{(t,k-1)} - w^*\|^2 - \frac{2}{n} \cdot \sum_{i=1}^n \eta_i^{(t)} \langle \tilde{w}^{(t,k-1)} - w^*, \nabla f_i(w_i^{(t,k-1)}) \rangle + \|\frac{\sum_{i=1}^n \eta_i^{(t)} \nabla f_i(w_i^{(t,k-1)})}{n}\|^2.
\end{aligned} \tag{91}$$

By (72) and (70), (91) can be further bounded by

$$\begin{aligned}
& \|\tilde{w}^{(t,k)} - w^*\|^2 \\
&= \|\tilde{w}^{(t,k-1)} - w^*\|^2 + 2\eta(1 - \Delta\bar{\Psi}^{(t)})(F(w^*) - F(\tilde{w}^{(t,k-1)})) + \left(\frac{\beta\eta}{n} \sum_{i=1}^n \|w_i^{(t,k-1)} - \tilde{w}^{(t,k-1)}\|^2\right) \\
&\quad + 4\eta\gamma\Delta\bar{\Psi}^{(t)} + \eta^2 \left(\frac{3\beta^2 \sum_{i=1}^n \|w_i^{(t,k-1)} - \tilde{w}^{(t,k-1)}\|^2}{n} + 6\beta(F(\tilde{w}^{(t,k-1)}) - F(w^*)) + 3\tau\right) \\
&\leq \|\tilde{w}^{(t,k-1)} - w^*\|^2 - (2\eta(1 - \Delta\bar{\Psi}^{(t)}) - 6\beta\eta^2)(F(\tilde{w}^{(t,k-1)}) - F(w^*)) \\
&\quad + (\eta\beta + 3\eta^2\beta^2) \frac{\sum_{i=1}^n \|w_i^{(t,k-1)} - \tilde{w}^{(t,k-1)}\|^2}{n} + 4\eta\gamma\Delta\bar{\Psi}^{(t)} + 3\eta^2\tau \\
&\leq \|\tilde{w}^{(t,k-1)} - w^*\|^2 - (2\eta(1 - \Delta\bar{\Psi}^{(t)}) - 6\beta\eta^2)(F(\tilde{w}^{(t,k-1)}) - F(w^*)) \\
&\quad + (\eta\beta + 3\eta^2\beta^2) \left(15\eta^2k^2\tau + \frac{12\eta^2k}{n} \left(\sum_{l=0}^{k-1} \beta(F(\tilde{w}^{(t,l)}) - F(w^*))\right) + 4\eta\gamma\Delta\bar{\Psi}^{(t)} + 3\eta^2\tau\right).
\end{aligned} \tag{92}$$

On the other hand, as for  $\|\bar{w}^{(t+1)} - w^*\|$ , we have that

$$\begin{aligned}
& \mathbb{E}[\|\bar{w}^{(t)} - w^*\|^2] = \mathbb{E}[\|\bar{w}^{(t)} - \tilde{w}^{(t,K)}\|^2] + \mathbb{E}[\|\tilde{w}^{(t,K)} - w^*\|^2] \\
&= \mathbb{E}\left[\left\|\frac{\sum_{k=1}^K \sum_{i=1}^n (1_i^{(1)} - q)\eta_i^{(t)} \nabla f_i(w_i^{(t,k-1)})}{nq}\right\|^2\right] + \mathbb{E}[\|\tilde{w}^{(t,K)} - w^*\|^2] + \sigma^2d \\
&\leq \frac{K\eta^2 \sum_{k=1}^K \sum_{i=1}^n \|\nabla f_i(w_i^{(t,k-1)})\|^2}{n^2q} + \mathbb{E}[\|\tilde{w}^{(t,K)} - w^*\|^2] + \sigma^2d \\
&\leq \frac{3K\eta^2 \sum_{k=1}^K \left\{ \sum_{i=1}^n (\beta^2 \|w_i^{(t,k-1)} - \tilde{w}^{(t,k-1)}\|^2) + 2\beta n(F(\tilde{w}^{(t,k-1)}) - F(w^*)) + n\tau \right\}}{n^2q} \\
&\quad + \mathbb{E}[\|\tilde{w}^{(t,K)} - w^*\|^2] + \sigma^2d \\
&= O(\|\bar{w}^{(0)} - w^*\|^2 + tK(\eta\gamma \frac{\mathcal{B}}{c + \mathcal{B}} + (\eta^2 + \eta^3K^2)\tau + \frac{K\tau\eta^2}{nq}) + t\sigma^2d).
\end{aligned} \tag{93}$$

for sufficiently small  $\eta = o(1/K)$  and  $K = O(nq)$ . Thus, with the above reasoning, we consider  $t = T$  and  $k = K$ , and then we obtain a global upper bound.

## D Utility of DP-LSGD in Strongly Convex Optimization

**Theorem D.1.** For an arbitrary objective loss function  $F(w) = \frac{1}{n} \cdot \sum_{i=1}^n f_i(w)$  where  $f_i(w)$  is  $\lambda$ -strongly-convex and  $\beta$ -smooth, when  $\eta < \min\{1/\beta, 2/(\beta + \lambda)\}$ , Algorithm 1 with clipped local update (2) ensures that

$$\mathbb{E}[\|\bar{w}^{(T)} - w^*\|^2] \leq (1 - (\eta\lambda)^2)^{TK} \|\bar{w}^{(0)} - w^*\|^2 + \frac{4(1 + \eta\lambda)^K \cdot (\frac{c^2}{nq} + \mathcal{B}^2 + \eta^2\tau K^2 + \sigma^2d)}{((1 + \eta\lambda)^K - 1)(1 - (\eta\lambda)^2)^K}. \tag{94}$$

710

*Proof.* For simplicity, we use  $G(w) = w - \eta\nabla F(w)$  to represent the output of gradient descent of function  $F(w)$ . Similarly, we use  $G_i(w) = w - \eta\nabla f_i(w)$  to denote the gradient descent output of the  $i$ -th individual loss function  $f_i(w)$ .

**Lemma D.1** ([50]). If  $F(w)$  is convex and  $\beta$ -smooth, and  $\eta \leq 2/\beta$ , then the operation  $G(w)$  is contractive, i.e.,

$$\|G(w) - G(w')\| \leq \|w - w'\|,$$

for arbitrary  $w$  and  $w'$ . In addition, if  $F(w)$  is  $\lambda$ -strongly convex and  $\beta$ -smooth, then if  $\eta \leq 2(\beta + \lambda)$ , then  $G(w)$  is strictly contractive such that

$$\|G(w) - G(w')\| \leq (1 - \frac{\eta\beta\lambda}{\beta + \lambda})\|w - w'\|.$$

714 In the  $t$ -th phase of Algorithm 1, conditional on the initialization  $\bar{w}^{(t-1)}$ , we first consider a virtual  
 715 trajectory produced by applying full gradient descent on  $F(w)$  with step size  $\eta$  for  $K$  iterations. We  
 716 denote those iterates by  $\tilde{w}^{(t,k)}$ , for  $k = 1, 2, \dots, K$ . Let  $w^* = \arg \min_{w \in \mathcal{W}} F(w)$  be the global  
 717 optimum, when  $\eta < 1/\beta$ ,

$$\|\tilde{w}^{(t,k)} - w^*\|^2 = \|\tilde{w}^{(t,k-1)} - w^* - \eta \nabla F(\tilde{w}^{(t,k-1)})\|^2 \quad (95)$$

$$\leq \|\tilde{w}^{(t,k-1)} - w^*\|^2 + \eta^2 \|\nabla F(\tilde{w}^{(t,k-1)})\|^2 - 2\eta(F(\tilde{w}^{(t,k-1)}) - F(w^*)) \quad (96)$$

$$\leq (1 - \eta\lambda)\|\tilde{w}^{(t,k-1)} - w^*\|^2 + (2\eta^2\beta - 2\eta)(F(\tilde{w}^{(t,k-1)}) - F(w^*)) \quad (97)$$

$$\leq (1 - \eta\lambda)\|\tilde{w}^{(t,k-1)} - w^*\|^2. \quad (98)$$

In (96), we use the property of strong convexity that

$$F(\tilde{w}^{(t,k-1)}) - F(w^*) \leq \langle \nabla F(\tilde{w}^{(t,k-1)}), \tilde{w}^{(t,k-1)} - w^* \rangle - \frac{\lambda}{2} \|\tilde{w}^{(t,k-1)} - w^*\|^2.$$

718 In (97), we use the smooth assumption that  $\frac{1}{2\beta} \cdot \|\nabla F(\tilde{w}^{(t,k-1)})\|^2 \leq F(\tilde{w}^{(t,k-1)}) - F(w^*)$ . Finally,  
 719 in (98), as  $\eta < 1/\beta$  and thus  $2\eta(\eta\beta - 1) < 0$ . Therefore,

$$\|\tilde{w}^{(t,K)} - w^*\|^2 \leq (1 - \eta\lambda)^K \|\bar{w}^{(t-1)} - w^*\|^2. \quad (99)$$

720 We will use  $\gamma_1 = (1 - \eta\lambda)^K$  for simplicity.

721 Now, we consider to bound the deviation between  $\tilde{w}^{(t,K)}$  and  $\bar{w}^{(t)}$ . In the following, we always  
 722 assume  $\eta < \min\{1/\beta, 2/(\beta + \lambda)\}$ . It is noted that, based on the strict contraction property of  $G$  and  
 723  $G_i$ , for any  $u$  and  $v$ ,

$$\begin{aligned} \|G_i(u) - G(v)\| &= \|G_i(u) - G_i(v) + G_i(v) - G(v)\| \leq \|G_i(u) - G_i(v)\| + \|G_i(v) - G(v)\| \\ &\leq (1 - \frac{\eta\beta\lambda}{\beta + \lambda})\|u - v\| + \eta\|\nabla f_i(v) - \nabla F(v)\|. \end{aligned}$$

724 In the following, we use  $\gamma_2 = (1 - \frac{\eta\beta\lambda}{\beta + \lambda})$  for simplicity. Similarly, for  $\{G_1, G_2, \dots, G_n\}$  on inputs  
 725  $\{u_1, u_2, \dots, u_n\}$ , we have

$$\begin{aligned} \left\| \frac{\sum_{i=1}^n G_i(u_i)}{n} - G(v) \right\| &\leq \gamma_2 \cdot \frac{\sum_{i=1}^n \|u_i - v\|}{n} + \left\| \frac{\sum_{i=1}^n G_i(v)}{n} - G(v) \right\| \\ &= \gamma_2 \cdot \frac{\sum_{i=1}^n \|u_i - v\|}{n}. \end{aligned} \quad (100)$$

726 At the  $t$ -th phase, from the initialization  $\bar{w}^{(t-1)}$ ,  $w_i^{(t,K)} = \underbrace{G_i \circ G_i \circ \dots \circ G_i}_k(\bar{w}^{(t-1)})$ . On the  
 727 other hand, with the same start point  $\bar{w}^{(t-1)}$ , the virtual iterate  $\tilde{w}^{(t,K)} = \underbrace{G \circ G \circ \dots \circ G}_k(\bar{w}^{(t-1)})$ .

728 Therefore, with a recursion reasoning,

$$\begin{aligned} &\left\| \tilde{w}^{(t,K)} - \frac{\sum_{i=1}^n w_i^{(t,K)}}{n} \right\| \\ &\leq \frac{\gamma_2 \cdot \sum_{i=1}^n \|w_i^{(t,K-1)} - \tilde{w}^{(t,K-1)}\|}{n} \\ &\leq \frac{\gamma_2 \cdot \sum_{i=1}^n (\gamma_2 \|w_i^{(t,K-2)} - \tilde{w}^{(t,K-2)}\| + \eta \|\nabla f_i(\tilde{w}^{(t,K-1)}) - \nabla F(\tilde{w}^{(t,K-1)})\|)}{n} \\ &\leq \|\bar{w}^{(t-1)} - \bar{w}^{(t-1)}\| + \frac{\eta \sum_{k=0}^{K-2} \gamma_2^{K-k} \sum_{i=1}^n \|\nabla f_i(\tilde{w}^{(t,k)}) - \nabla F(\tilde{w}^{(t,k)})\|}{n} \\ &\leq \frac{\eta\sqrt{\tau}(1 - \gamma_2^K)}{1 - \gamma_2}. \end{aligned} \quad (101)$$

729 Here, in (101), we apply Assumption 2.1 on the variance bound  $\tau$ , where the sampling noise of  
 730 stochastic gradient satisfies  $\|\sum_{i=1}^n (\nabla f_i(w) - \nabla F(w))\| \leq n\mathcal{B}$ . Now, we further take the clipping

operation, i.i.d. sampling and DP noise into accountant. First, due to the clipping, stemmed from (101),

$$\begin{aligned}
& \left\| \frac{\sum_{i=1}^n \bar{w}^{(t-1)} + \mathcal{CP}(\Delta w_i^{(t)}, c)}{n} - \tilde{w}^{(t,K)} \right\| = \left\| \frac{\sum_{i=1}^n \bar{w}^{(t-1)} + \mathcal{CP}(w_i^{(t,K)} - \bar{w}^{(t-1)}, c)}{n} - \tilde{w}^{(t,K)} \right\| \\
& \leq \left\| \frac{\sum_{i=1}^n (\bar{w}^{(t-1)} + \mathcal{CP}(w_i^{(t,K)} - \bar{w}^{(t-1)}, c) - w_i^{(t,K)})}{n} \right\| + \left\| \frac{\sum_{i=1}^n w_i^{(t,K)}}{n} - \tilde{w}^{(t,K)} \right\| \\
& \leq \mathcal{B} + \frac{\eta\sqrt{\tau}(1 - \gamma_2^K)}{1 - \gamma_2}.
\end{aligned} \tag{102}$$

In the following, we proceed to incorporate the sampling noise and DP noise into the deviation analysis. Let  $\mu^{(t)} = \frac{\sum_{i=1}^n \mathcal{CP}(\Delta w_i^{(t)}, c)}{n}$  be the average of clipped local update at the  $t$ -th phase. Let  $\mathbf{1}_i^{(t)}$  to be an indicator which equals 1 iff the  $i$ -th sample gets selected (independently with rate  $q$ ). Then,

$$\mathbb{E}[\|\bar{w}^{(t)} - \tilde{w}^{(t,K)}\|] = \mathbb{E}[\|\bar{w}^{(t-1)} + \frac{\sum_{i=1}^n \mathbf{1}_i^{(t)} \cdot \mathcal{CP}(\Delta w_i^{(t)}, c)}{nq} + e^{(t)} - \tilde{w}^{(t,K)}\|] \tag{103}$$

$$\leq \mathbb{E}[\|\bar{w}^{(t-1)} + \frac{\sum_{i=1}^n \mathbf{1}_i^{(t)} \cdot \mathcal{CP}(\Delta w_i^{(t)}, c)}{nq} - \tilde{w}^{(t,K)}\|] + \sigma\sqrt{d} \tag{104}$$

$$= \mathbb{E}[\|\bar{w}^{(t-1)} + \frac{\sum_{i=1}^n \mathbf{1}_i^{(t)} \cdot \mathcal{CP}(\Delta w_i^{(t)}, c)}{nq} - \mu^{(t)} + \mu^{(t)} - \tilde{w}^{(t,K)}\|] + \sigma\sqrt{d} \tag{105}$$

$$\leq \mathbb{E}[\|\frac{\sum_{i=1}^n (\mathbf{1}_i^{(t)} - q) \cdot \mathcal{CP}(\Delta w_i^{(t)}, c)}{nq}\|] + \|\bar{w}^{(t-1)} - \tilde{w}^{(t,K)} + \mu^{(t)}\| + \sigma\sqrt{d} \tag{106}$$

$$\leq \sqrt{\frac{nc^2}{n^2q}} + \mathcal{B} + \frac{\eta\sqrt{\tau}(1 - \gamma_2^K)}{1 - \gamma_2} + \sigma\sqrt{d}. \tag{107}$$

In (104), we use the fact that  $Q^{(t)}$  is independent DP noise with zero mean and  $\mathbb{E}[\|Q^{(t)}\|] = \sigma\sqrt{d}$ . In (106), we use the triangle inequality. In (107), we use the convexity of  $l_2$  norm function and it is noted that  $(\mathbf{1}_i^{(t)} - q)$  for  $i = 1, 2, \dots, n$ , are i.i.d. and of zero mean while  $\|\mathcal{CP}(\Delta w_i^{(t)}, c)\| \leq c$ .

So far, we have derived the expected deviation between  $\bar{w}^{(t)}$  and  $\tilde{w}^{(t,K)}$  at the end of the  $t$ -th phase conditional on  $\bar{w}^{(t-1)}$ . In the following, we will continue to incorporate such deviation to (99).

By applying the AM-GM inequality,  $\|u - v\|^2 \leq (1 + z)\|u\|^2 + (1 + \frac{1}{z})\|v\|^2$  for any  $z > 0$ , on  $\|\bar{w}^{(t)} - w^*\|^2 = \|(\tilde{w}^{(t,K)} - w^*) + (\bar{w}^{(t)} - \tilde{w}^{(t,K)})\|^2$ , we have that

$$\begin{aligned}
\mathbb{E}[\|\bar{w}^{(t)} - w^*\|^2] & \leq (1 + z)\mathbb{E}[\|\tilde{w}^{(t,K)} - w^*\|^2] + (1 + \frac{1}{z})\mathbb{E}[\|\bar{w}^{(t)} - \tilde{w}^{(t,K)}\|^2] \\
& \leq (1 + z)\gamma_1\mathbb{E}[\|\bar{w}^{(t-1)} - w^*\|^2] + (1 + \frac{1}{z})\left(\frac{c}{\sqrt{nq}} + \mathcal{B} + \frac{\eta\sqrt{\tau}(1 - \gamma_2^K)}{1 - \gamma_2} + \sigma\sqrt{d}\right)^2 \\
& \leq (1 + z)\gamma_1\mathbb{E}[\|\bar{w}^{(t-1)} - w^*\|^2] + 4(1 + \frac{1}{z})\left(\frac{c^2}{nq} + \mathcal{B}^2 + \frac{\eta^2\tau(1 - \gamma_2^K)^2}{(1 - \gamma_2)^2} + \sigma^2d\right)
\end{aligned} \tag{108}$$

Based on (108) by recursion, we further obtain the following unconditional expectation

$$\begin{aligned}
\mathbb{E}[\|\bar{w}^{(T)} - w^*\|^2] & \leq ((1 + z)\gamma_1)^T \|\bar{w}^{(0)} - w^*\|^2 + \frac{4(1 + \frac{1}{z})}{1 - (1 + z)\gamma_1} \left(\frac{c^2}{nq} + \mathcal{B}^2 + \frac{\eta^2\tau^2(1 - \gamma_2^K)^2}{(1 - \gamma_2)^2} + \sigma^2d\right) \\
& \leq (1 - (\eta\lambda)^2)^{TK} \|\bar{w}^{(0)} - w^*\|^2 + \frac{4(1 + \eta\lambda)^K \cdot \left(\frac{c^2}{nq} + \mathcal{B}^2 + \eta^2\tau K^2 + \sigma^2d\right)}{((1 + \eta\lambda)^K - 1)(1 - (\eta\lambda)^2)^K}
\end{aligned} \tag{109}$$

In (109), we select  $z = (1 + \eta\lambda)^K - 1$ ,  $\square$



## E Proof of Theorem 4.2: Utility of DP-LSGD in Non-Convex Optimization

To apply Theorem 3.2 on DP-LSGD, we may equivalently view the perturbation term  $Q^{(t)}$  as formed by two parts. One is due to the local update clipping and the other is the DP noise added, denoted by  $e^{(t)}$  in this proof. To be formal,  $Q^{(t)}$  can be rewritten as follows,

$$\begin{aligned} Q^{(t)} &= \frac{\eta}{nq} \sum_{i \in S_t} \sum_{k=0}^{K-1} \left(1 - \frac{c}{\max\{\|\sum_{k=0}^{K-1} g_i^k\|, c\}}\right) g_i^k + e^{(t)} \\ &= \underbrace{\frac{\eta}{nq} \sum_{i=1}^n \sum_{k=0}^{K-1} 1_i^{(t)} \left(1 - \frac{c}{\max\{\|\sum_{k=0}^{K-1} g_i^k\|, c\}}\right) g_i^k}_{(A)} + e^{(t)}. \end{aligned} \quad (110)$$

In (110), term (A) corresponds to the correction term due to the clipping, where equivalently the learning rate of the local update from each sample is scaled by a factor determined by the norm  $\|\sum_{k=0}^{K-1} g_i^k\|$ .  $e^{(t)}$  is the independent DP noise added in the  $t$ -th phase. Therefore, conditional on  $\bar{w}^{(t-1)}$ , the expectation of  $\|Q^{(t)}\|^2$  is in the following form,

$$\begin{aligned} \mathbb{E}[\|Q^{(t)}\|^2] &= \frac{\mathbb{E}[\|\sum_{i=1}^n \sum_{k=0}^{K-1} 1_i^{(t)} \eta \left(1 - \frac{c}{\max\{\|\sum_{k=0}^{K-1} g_i^k\|, c\}}\right) g_i^k\|^2]}{(nq)^2} + \sigma^2 d \\ &\leq \frac{\sum_{i=1}^n \mathbb{E}[\|\eta \left(1 - \frac{c}{\max\{\|\sum_{k=0}^{K-1} g_i^k\|, c\}}\right) \sum_{k=0}^{K-1} g_i^k\|^2]}{nq} + \sigma^2 d \\ &= \frac{\sum_{i=1}^n \mathbb{E}[(\Psi_i^{(t)})^2]}{nq} + \sigma^2 d = q\mathcal{B}^2 + \sigma^2 d. \end{aligned} \quad (111)$$

Recall Definition 4.1, in (111),  $\Psi_i^{(t)}$  is the incremental norm of the local update by  $i$ -th sample in the  $t$ -th phase, i.e.,  $\max\{\|\eta \sum_{k=0}^{K-1} g_i^k\| - c, 0\}$ . Now, plugging the form of  $\mathbb{E}[\|Q^{(t)}\|^2]$  in (111) back to Theorem 3.2, we obtain the utility bound claimed for DP-LSGD.

## F Additional Experiments and Experiment Setups

For all the experiments with respect to CIFAR10, we assume the training data set of 50,000 samples is private. Similarly, for SVHN, we assume the training data set of 73,257 samples is private. In Fig. 2 (a,b), we report the statistics of normalized incremental norm when we train ResNet 20 on SVHN. Very similar to our observation on CIFAR10, both the mean and the standard deviation of the normalized incremental norm in DP-LSGD is only about a half of those in DP-SGD, which suggest that DP-LSGD bears less influence from the clipping operator. As a consequence, in Fig. 2 (c), we can see DP-LSGD enjoys a faster convergence rate accompanying with a better utility-privacy tradeoff. Our code can be found in the following anonymous Github link: <https://anonymous.4open.science/r/DP-Local-SGD--262F/README.md>.

As for the hyper-parameter selection, in Table 1, for both the experiments on CIFAR10 and SVHN, the total number of phases  $T$  is selected to be 1000, 1000, 1500, 1500, 2000 and 2000 for  $\epsilon = 1.5, 2, 2.5, 3, 3.5$  and 4, respectively. For DP-LSGD,  $K$  is always fixed to be 10 and  $\eta = 0.025$ ; while for DP-SGD,  $K = 1, \eta = 1$ .

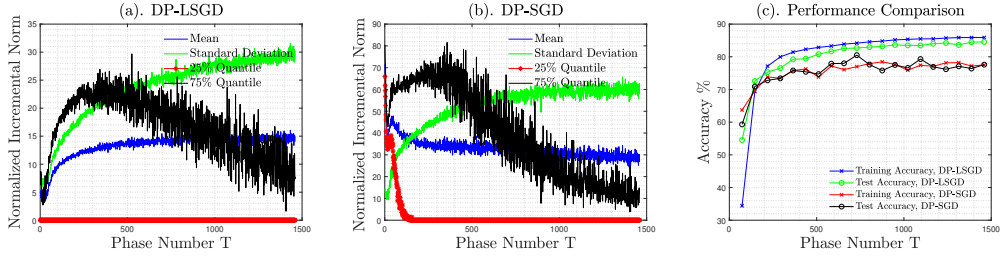

Figure 2: Training ResNet 20 on SVHN with DP-LSGD ( $K = 10, \eta = 0.025, c = 1$ ) and DP-SGD ( $K = 1, \eta = 1, c = 1$ ) under  $(\epsilon = 2, \delta = 10^{-5})$ -DP, with expected batch size 1000.
